# Supplementary material for: Assessing the storage potential of Australian rainforest seeds: a decision-making key to aid rapid conservation
Source: Springer Nature journal article supplement (doi:10.1007/s10531-021-02244-1), 2021-07-19
Supplement: MOESM1 [file 19374490]

**Online Resource 1: Test conditions and results for germination experiments conducted to determine the seed storage behaviour of 162 Australian rainforest species.** Nomenclature follows the Australian Plant Census (<https://bidiversity.org.au>) or PlantNET (<https://plantnet.rbgsyd.nsw.gov.au>) where indicated by \*. 'Acc No.' refers to the Australian PlantBank accession number assigned to each seed collection. Italicised accession numbers indicate seeds collected from cultivated specimens. Storage treatments consisted of 'Fresh' (untreated), 'Dried' (dried at the relative humidity (%RH) shown in brackets at a temperature of 15-20°C), and 'Stored' (hermetically sealed in laminated foil packets and stored at the temperature shown in brackets). 'SMC' is the gravimetrically determined seed moisture content (% fresh weight basis) of seeds when fresh, after drying and during storage. Germination media consisted of 0.7-0.9% water agar ('WA'), water agar with 250ppm gibberellic acid ('GA<sub>3</sub>'), or propagation mix ('Prop mix') composed of equal parts sharp sand and perlite. 'Germ' refers to the final germination percentage, ± standard error ('se'), adjusted for empty seeds. 'Viable' refers to the percentage of non-germinating seeds that still appeared viable when dissected on termination of the experiment.

| Species                         | Acc No.  | Storage treatments    |         |                   |             | Germination conditions |           |                 | Germination results |                      |               |                 |
|---------------------------------|----------|-----------------------|---------|-------------------|-------------|------------------------|-----------|-----------------|---------------------|----------------------|---------------|-----------------|
|                                 |          | Treatment (%RH or °C) | SMC (%) | Duration (months) |             | Pre-treatment          | Temp (°C) | Media           | No. seeds (reps)    | Days to first (last) | Germ (% ± se) | Viable (% ± se) |
| <b>Acanthaceae</b>              |          |                       |         |                   |             |                        |           |                 |                     |                      |               |                 |
| <i>Harnieria hygrophiloides</i> | 20120186 | Stored (-18)          | 9.0     | Drying 3m         | Storage 50m | None                   | 25        | WA              | 10(5)               | 16(71)               | 84 ± 5        | 0 ± 0           |
| <b>Anarcardiaceae</b>           |          |                       |         |                   |             |                        |           |                 |                     |                      |               |                 |
| <i>Euroschinus falcata</i>      | 20141716 | Fresh                 | 41.9    | na                | na          | Flesh removed          | 20        | GA <sub>3</sub> | 10(5)               | 11(11)               | 90 ± 3 a      | 0 ± 0           |
| <i>Euroschinus falcata</i>      | 20141716 | Dried (15%)           | 4.7     | 1m                | na          | Flesh removed          | 20        | GA <sub>3</sub> | 10(5)               | 6(6)                 | 88 ± 4 a      | 0 ± 0           |
| <i>Euroschinus falcata</i>      | 20141716 | Stored (-18)          | ≤ 4.7   | 4m                | 25m         | Flesh removed          | 20        | GA <sub>3</sub> | 10(5)               | 5(15)                | 78 ± 6 a      | 0 ± 0           |
| <b>Annonaceae</b>               |          |                       |         |                   |             |                        |           |                 |                     |                      |               |                 |
| <i>Meiogyne stenopetala</i>     | 20151558 | Fresh                 | 26.0    | na                | na          | None                   | 25        | Prop mix        | 47(1)               | 49(240)              | 85 a          | 0               |
| <i>Meiogyne stenopetala</i>     | 20151558 | Dried (15%)           | 5.6     | 4m                | na          | None                   | 25        | Prop mix        | 49(1)               | 71(183)              | 42 b          | nd              |
| <i>Meiogyne stenopetala</i>     | 20151558 | Stored (-18)          | 5.6     | 4m                | 1m          | None                   | 25        | Prop mix        | 50(1)               | 85(225)              | 12 c          | 36              |
| <b>Apocynaceae</b>              |          |                       |         |                   |             |                        |           |                 |                     |                      |               |                 |
| <i>Alstonia constricta</i>      | 20150330 | Dried (15%)           | 4.7     | 6m                | na          | None                   | 25        | WA              | 10(5)               | 4(25)                | 88 ± 6 a      | 8 ± 6           |
| <i>Alstonia constricta</i>      | 20150330 | Stored (-18)          | 4.7     | 6m                | 2m          | None                   | 25        | WA              | 10(5)               | 6(23)                | 88 ± 4 a      | 2 ± 2           |
| <i>Cynanchum elegans</i>        | 20110496 | Dried (15%)           | ≤ 3.9   | 2m                | na          | None                   | 20        | WA              | 10(3)               | 8(17)                | 82 ± 12 a     | 0 ± 0           |
| <i>Cynanchum elegans</i>        | 20110496 | Stored (-18)          | 3.9     | 1m                | 69m         | None                   | 20        | WA              | 10(5)               | 7(33)                | 90 ± 6 a      | 0 ± 0           |
| <i>Marsdenia rostrata</i>       | 20150523 | Dried (15%)           | nd      | 3m                | na          | None                   | 25        | WA              | 5(3)                | 4(7)                 | 73 ± 18 a     | 7 ± 7           |
| <i>Marsdenia rostrata</i>       | 20150523 | Stored (-18)          | nd      | 3m                | 15m         | None                   | 25        | WA              | 4(5)                | 7(57)                | 90 ± 6 a      | 0 ± 0           |
| <i>Melodinus australis</i>      | 20140063 | Fresh                 | 47.1    | na                | na          | 2% bleach              | 20        | GA <sub>3</sub> | 10(5)               | 35(81)               | 100 ± 0 a     | 0 ± 0           |
| <i>Melodinus australis</i>      | 20140063 | Dried (15%)           | 1.9     | 1m                | na          | 2% bleach              | 20        | GA <sub>3</sub> | 10(5)               | 36(81)               | 96 ± 2 a      | 0 ± 0           |
| <i>Melodinus australis</i>      | 20140063 | Stored (-18)          | ≤ 1.9   | 29m               | 13m         | 2% bleach              | 20        | GA <sub>3</sub> | 10(5)               | na                   | 0 ± 0 b       | 0 ± 0           |
| <i>Parsonsia fulva</i>          | 20140091 | Dried (15%)           | ≤ 5.1   | 15m               | na          | None                   | 20        | WA              | 10(5)               | 11(20)               | 86 ± 7 a      | 2 ± 2           |
| <i>Parsonsia fulva</i>          | 20140091 | Stored (-18)          | 5.1     | 5m                | 26m         | None                   | 20        | WA              | 10(5)               | 12(47)               | 81 ± 9 a      | 4 ± 4           |

| Species                           | Acc No.  | Storage treatments    |         |                   |     | Germination conditions |           |                 | Germination results |                      |               |                 |
|-----------------------------------|----------|-----------------------|---------|-------------------|-----|------------------------|-----------|-----------------|---------------------|----------------------|---------------|-----------------|
|                                   |          | Treatment (%RH or °C) | SMC (%) | Duration (months) |     | Pre-treatment          | Temp (°C) | Media           | No. seeds (reps)    | Days to first (last) | Germ (% ± se) | Viable (% ± se) |
| <i>Parsonsia induplicata</i>      | 20150504 | Dried (15%)           | 5.7     | 4m                | na  | None                   | 20        | WA              | 10(5)               | 7(32)                | 98 ± 2 a      | 2 ± 2           |
| <i>Parsonsia induplicata</i>      | 20150504 | Stored (-18)          | 5.7     | 4m                | 2m  | None                   | 20        | WA              | 10(5)               | 4(28)                | 98 ± 2 a      | 0 ± 0           |
| <i>Tabernaemontana pandacaqui</i> | 20120180 | Fresh                 | 33.9    | na                | na  | None                   | 25        | WA              | 7(3)                | 6(30)                | 95 ± 5 a      | 0 ± 0           |
| <i>Tabernaemontana pandacaqui</i> | 20120180 | Dried (15%)           | 3.1     | 2m                | na  | None                   | 25        | WA              | 7(3)                | 11(47)               | 81 ± 13 a     | 5 ± 5           |
| <i>Tylophora benthamii</i>        | 20131737 | Fresh                 | 24.6    | na                | na  | None                   | 25        | GA <sub>3</sub> | 10(5)               | 5(14)                | 96 ± 2 a      | 0 ± 0           |
| <i>Tylophora benthamii</i>        | 20131737 | Dried (15%)           | 6.3     | 1m                | na  | None                   | 25        | GA <sub>3</sub> | 10(5)               | 6(10)                | 94 ± 2 a      | 0 ± 0           |
| <b>Araceae</b>                    |          |                       |         |                   |     |                        |           |                 |                     |                      |               |                 |
| <i>Gymnostachys anceps</i>        | 20130086 | Fresh                 | 56.4    | na                | na  | None                   | 25        | WA              | 10(5)               | 15(74)               | 98 ± 2 a      | 0 ± 0           |
| <i>Gymnostachys anceps</i>        | 20130086 | Dried (15%)           | 4.4     | 2m                | na  | None                   | 25        | WA              | 9(5)                | na                   | 0 ± 0 b       | 0 ± 0           |
| <i>Pothos longipes</i>            | 20130266 | Fresh                 | nd      | na                | na  | None                   | 25        | GA <sub>3</sub> | 5(3)                | 3(7)                 | 100 ± 0 a     | 0 ± 0           |
| <i>Pothos longipes</i>            | 20130266 | Dried (15%)           | 5.1     | 3m                | na  | None                   | 25        | GA <sub>3</sub> | 6(3)                | na                   | 0 ± 0 b       | 0 ± 0           |
| <b>Araliaceae</b>                 |          |                       |         |                   |     |                        |           |                 |                     |                      |               |                 |
| <i>Hydrocotyle pedicellosa</i>    | 20150877 | Dried (15%)           | 4.9     | 2m                | na  | None                   | 25        | WA              | 5(5)                | 18(91)               | 65 ± 17 a     | 0 ± 0           |
| <i>Hydrocotyle pedicellosa</i>    | 20150877 | Stored (-18)          | 4.9     | 2m                | 4m  | None                   | 25        | WA              | 5(5)                | 34(78)               | 80 ± 6 a      | 0 ± 0           |
| <i>Polyscias murrayi</i>          | 20130514 | Fresh                 | 40.9    | na                | na  | None                   | 25        | GA <sub>3</sub> | 10(5)               | 24(42)               | 96 ± 2 a      | 0 ± 0           |
| <i>Polyscias murrayi</i>          | 20130514 | Dried (15%)           | 4.5     | 1m                | na  | None                   | 25        | GA <sub>3</sub> | 10(5)               | 21(42)               | 58 ± 16 b     | 0 ± 0           |
| <i>Polyscias murrayi</i>          | 20130514 | Stored (-18)          | ≤ 4.5   | 2m                | 15m | None                   | 25        | GA <sub>3</sub> | 10(5)               | 29(47)               | 22 ± 4 b      | 6 ± 4           |
| <b>Arecaceae</b>                  |          |                       |         |                   |     |                        |           |                 |                     |                      |               |                 |
| <i>Linospadix monostachyos</i>    | 20120197 | Fresh                 | 46.9    | na                | na  | None                   | 25        | WA              | 10(5)               | 35(96)               | 86 ± 4 a      | 6 ± 4           |
| <i>Linospadix monostachyos</i>    | 20120197 | Dried (15%)           | 4.6     | 2m                | na  | None                   | 25        | WA              | 10(5)               | na                   | 0 ± 0 b       | 2 ± 2           |
| <b>Argophyllaceae</b>             |          |                       |         |                   |     |                        |           |                 |                     |                      |               |                 |
| <i>Argophyllum nullumense</i>     | 20131009 | Fresh                 | nd      | na                | na  | None                   | 25        | GA <sub>3</sub> | 10(5)               | 7(14)                | 94 ± 4 a      | 6 ± 4           |
| <i>Argophyllum nullumense</i>     | 20131009 | Dried (15%)           | 2.0     | 24m               | na  | None                   | 25        | WA              | 20(5)               | 11(23)               | 90 ± 6 a      | 10 ± 6          |
| <i>Argophyllum nullumense</i>     | 20131009 | Stored (-18)          | 2.0     | 1m                | 12m | None                   | 25        | GA <sub>3</sub> | 10(5)               | 10(17)               | 100 ± 0 a     | 0 ± 0           |
| <b>Asparagaceae</b>               |          |                       |         |                   |     |                        |           |                 |                     |                      |               |                 |
| <i>Cordyline rubra</i>            | 20120195 | Fresh                 | 24.2    | na                | na  | Scarified day 79       | 25        | GA <sub>3</sub> | 10(3)               | 66(144)              | 43 ± 15 a     | 57 ± 15         |
| <i>Cordyline rubra</i>            | 20120195 | Dried (15%)           | 4.7     | 1m                | na  | Scarified day 90       | 25        | GA <sub>3</sub> | 10(3)               | 96(164)              | 63 ± 12 a     | 13 ± 7          |
| <i>Cordyline rubra</i>            | 20140080 | Stored (-18)          | ≤ 4.7   | 5m                | 24m | None                   | 25        | GA <sub>3</sub> | 10(5)               | na                   | 0 ± 0         | 96 ± 4          |

| Species                               | Acc No.  | Storage treatments    |         |                   |      | Germination conditions |           |                 | Germination results |                      |               |                 |
|---------------------------------------|----------|-----------------------|---------|-------------------|------|------------------------|-----------|-----------------|---------------------|----------------------|---------------|-----------------|
|                                       |          | Treatment (%RH or °C) | SMC (%) | Duration (months) |      | Pre-treatment          | Temp (°C) | Media           | No. seeds (reps)    | Days to first (last) | Germ (% ± se) | Viable (% ± se) |
| <i>Cordyline</i> sp. Mt Banda Banda * | 20170613 | Fresh                 | 26.3    | na                | na   | 2% bleach              | 25/10     | WA              | 10(5)               | 74(211)              | 63 ± 9 a      | 26 ± 4          |
| <i>Cordyline</i> sp. Mt Banda Banda   | 20170613 | Dried (15%)           | 3.8     | 1m                | na   | 2% bleach              | 25/10     | WA              | 10(5)               | 78(197)              | 78 ± 6 a      | 16 ± 7          |
| <i>Cordyline</i> sp. Mt Banda Banda   | 20170613 | Stored (-18)          | 3.8     | 1m                | 1m   | 2% bleach              | 25/10     | WA              | 10(5)               | 70(168)              | 38 ± 4 b      | 34 ± 9          |
| <b>Asteliaceae</b>                    |          |                       |         |                   |      |                        |           |                 |                     |                      |               |                 |
| <i>Neoastelia spectabilis</i>         | 20180138 | Fresh                 | 9       | na                | na   | None                   | 25/15     | WA              | 10(5)               | 50(268)              | 84 ± 4 a      | 0 ± 0           |
| <i>Neoastelia spectabilis</i>         | 20180138 | Dried (15%)           | 3.9     | 0.5               | na   | None                   | 25/15     | WA              | 10(5)               | 51(249)              | 84 ± 7 a      | 2 ± 2           |
| <i>Neoastelia spectabilis</i>         | 20180138 | Stored (-18)          | 3.9     | 0.5               | 2m   | None                   | 25/15     | WA              | 10(5)               | 34(137)              | 94 ± 2 a      | 2 ± 2           |
| <b>Asteraceae</b>                     |          |                       |         |                   |      |                        |           |                 |                     |                      |               |                 |
| <i>Sigesbeckia orientalis</i>         | 20150510 | Dried (15%)           | nd      | 4m                | na   | None                   | 20        | WA              | 10(5)               | 3(14)                | 90 ± 4 a      | 6 ± 4           |
| <i>Sigesbeckia orientalis</i>         | 20150510 | Stored (-18)          | nd      | 4m                | 13m  | None                   | 20        | WA              | 10(5)               | 9(17)                | 84 ± 5 a      | 14 ± 5          |
| <i>Vittadinia tenuissima</i>          | 20150509 | Dried (15%)           | nd      | 4m                | na   | None                   | 20        | WA              | 10(5)               | 4(18)                | 78 ± 8 a      | 0 ± 0           |
| <i>Vittadinia tenuissima</i>          | 20150509 | Stored (-18)          | nd      | 4m                | 2m   | None                   | 20        | WA              | 10(5)               | 6(23)                | 44 ± 3 b      | 0 ± 0           |
| <b>Atherospermataceae</b>             |          |                       |         |                   |      |                        |           |                 |                     |                      |               |                 |
| <i>Doryphora sassafras</i>            | 20140279 | Fresh                 | 27.0    | na                | na   | 2% bleach              | 20        | GA <sub>3</sub> | 8(5)                | 41(118)              | 68 ± 4 a      | 11 ± 4          |
| <i>Doryphora sassafras</i>            | 20140279 | Dried (15%)           | 7.7     | 7m                | na   | 2% bleach              | 20        | GA <sub>3</sub> | 10(5)               | 48(142)              | 44 ± 9 a      | 10 ± 0          |
| <i>Doryphora sassafras</i>            | 20100222 | Dried (15%)           | ≤ 6.0   | 8m                | na   | None                   | 20        | GA <sub>3</sub> | 10(5)               | 30(90)               | 44 ± 4 a      | 22 ± 6          |
| <i>Doryphora sassafras</i>            | 20100222 | Stored (-18)          | 6.0     | 2m                | 75m  | None                   | 20        | GA <sub>3</sub> | 10(5)               | na                   | 0 ± 0 b       | 2 ± 2           |
| <b>Bignoniaceae</b>                   |          |                       |         |                   |      |                        |           |                 |                     |                      |               |                 |
| <i>Pandorea pandorana</i>             | 20030886 | Dried (15%)           | 2.7     | 2m                | na   | None                   | 20        | WA              | 10(5)               | 5(12)                | 96 ± 2 a      | 4 ± 2           |
| <i>Pandorea pandorana</i>             | 20030886 | Stored (-18)          | 2.7     | <1m               | 144m | None                   | 20        | WA              | 10(5)               | 6(31)                | 94 ± 4 a      | 0 ± 0           |
| <b>Boraginaceae</b>                   |          |                       |         |                   |      |                        |           |                 |                     |                      |               |                 |
| <i>Ehretia acuminata</i>              | 20130056 | Fresh                 | 32.4    | na                | na   | None                   | 25        | GA <sub>3</sub> | 10(5)               | 10(20)               | 50 ± 12 a     | 0 ± 0           |
| <i>Ehretia acuminata</i>              | 20130056 | Dried (15%)           | 6.0     | 3m                | na   | None                   | 25        | GA <sub>3</sub> | 10(5)               | 10(14)               | 12 ± 6 b      | 0 ± 0           |
| <i>Ehretia acuminata</i>              | 20130056 | Stored (-18)          | ≤ 6.0   | 5m                | 12m  | None                   | 25        | GA <sub>3</sub> | 10(5)               | 12(25)               | 28 ± 2 a      | 0 ± 0           |
| <i>Ehretia acuminata</i>              | 20130056 | Stored (-18)          | ≤ 6.0   | 5m                | 34m  | None                   | 25        | GA <sub>3</sub> | 10(5)               | 12(19)               | 14 ± 5 b      | 4 ± 2           |
| <b>Capparaceae</b>                    |          |                       |         |                   |      |                        |           |                 |                     |                      |               |                 |
| <i>Apophyllum anomalum</i>            | 20130057 | Fresh                 | 42.8    | na                | na   | None                   | 25        | WA              | 10(5)               | 4(7)                 | 94 ± 4 a      | 0 ± 0           |
| <i>Apophyllum anomalum</i>            | 20130057 | Dried (15%)           | 2.5     | 3m                | na   | None                   | 25        | GA <sub>3</sub> | 10(5)               | 3(14)                | 44 ± 5 b      | 6 ± 4           |
| <i>Apophyllum anomalum</i>            | 20130057 | Stored (-18)          | ≤ 2.5   | 5m                | 36m  | None                   | 25        | Prop mix        | 10(5)               | 16(58)               | 21 ± 3 c      | 4 ± 2           |

| Species                                    | Acc No.  | Storage treatments       |            |                      |     | Germination conditions      |              |                 | Germination results |                         |                  |                    |
|--------------------------------------------|----------|--------------------------|------------|----------------------|-----|-----------------------------|--------------|-----------------|---------------------|-------------------------|------------------|--------------------|
|                                            |          | Treatment<br>(%RH or °C) | SMC<br>(%) | Duration<br>(months) |     | Pre-treatment               | Temp<br>(°C) | Media           | No. seeds<br>(reps) | Days to<br>first (last) | Germ<br>(% ± se) | Viable<br>(% ± se) |
| <b>Celastraceae</b>                        |          |                          |            |                      |     |                             |              |                 |                     |                         |                  |                    |
| <i>Celastrus subspicatus</i>               | 20150882 | Fresh                    | 36.5       | na                   | na  | 1% bleach, aril removed     | 20           | GA <sub>3</sub> | 10(5)               | 8(27)                   | 92 ± 4 a         | 0 ± 0              |
| <i>Celastrus subspicatus</i>               | 20150882 | Dried (15%)              | nd         | 2m                   | na  | aryl removed                | 25           | WA              | 10(5)               | 10(32)                  | 50 ± 3 b         | 8 ± 4              |
| <i>Celastrus subspicatus</i>               | 20150882 | Stored (-18)             | nd         | 2m                   | 3m  | 2% bleach, aril removed     | 25           | WA              | 10(5)               | 13(23)                  | 74 ± 11 ab       | 0 ± 0              |
| <i>Denhamia silvestris</i>                 | 20140069 | Fresh                    | 16.3       | na                   | na  | 4% bleach                   | 20           | GA <sub>3</sub> | 10(5)               | 10(70)                  | 94 ± 3 a         | 2 ± 2              |
| <i>Denhamia silvestris</i>                 | 20140069 | Dried (15%)              | 4.2        | 2m                   | na  | 4% bleach                   | 20           | GA <sub>3</sub> | 10(5)               | 12(26)                  | 72 ± 7 a         | 4 ± 2              |
| <i>Denhamia silvestris</i>                 | 20140069 | Stored (-18)             | 4.2        | 2m                   | 25m | 1% bleach                   | 20           | GA <sub>3</sub> | 10(5)               | 55(55)                  | 2 ± 2 b          | 0 ± 0              |
| <i>Elaeodendron australe var. australe</i> | 20120183 | Fresh                    | 29.7       | na                   | na  | Endocarp removed            | 25           | WA              | 10(5)               | 5(19)                   | 70 ± 8 a         | 4 ± 2              |
| <i>Elaeodendron australe var. australe</i> | 20120183 | Dried (15%)              | 3.8        | 3m                   | na  | Endocarp removed            | 25           | GA <sub>3</sub> | 10(5)               | 9(26)                   | 46 ± 8 a         | 0 ± 0              |
| <b>Commelinaceae</b>                       |          |                          |            |                      |     |                             |              |                 |                     |                         |                  |                    |
| <i>Pollia crispata</i>                     | 20140078 | Dried (15%)              | ≤ 5.7      | 7m                   | na  | None                        | 25           | GA <sub>3</sub> | 10(5)               | 13(42)                  | 68 ± 6 a         | 2 ± 2              |
| <i>Pollia crispata</i>                     | 20140078 | Stored (-18)             | 5.7        | 5m                   | 2m  | None                        | 25           | GA <sub>3</sub> | 10(5)               | 10(55)                  | 63 ± 10 a        | 2 ± 2              |
| <i>Pollia crispata</i>                     | 20140078 | Stored (-18)             | 5.7        | 5m                   | 22m | None                        | 25           | GA <sub>3</sub> | 12(5)               | 12(47)                  | 60 ± 8 a         | 0 ± 0              |
| <b>Convolvulaceae</b>                      |          |                          |            |                      |     |                             |              |                 |                     |                         |                  |                    |
| <i>Calystegia marginata</i>                | 20160110 | Fresh <sup>b</sup>       | 11.6       | na                   | na  | 1% bleach, scarified day 44 | 25           | WA              | 9(5)                | 4(59)                   | 84 ± 4 a         | 0 ± 0              |
| <i>Calystegia marginata</i>                | 20160110 | Dried (15%)              | 1.8        | 6m                   | na  | 1% bleach, scarified        | 25           | WA              | 10(5)               | 5(27)                   | 70 ± 8 a         | 12 ± 7             |
| <i>Calystegia marginata</i>                | 20160110 | Stored (-18)             | 1.8        | 7m                   | 1m  | 1% bleach, scarified        | 25           | GA <sub>3</sub> | 10(5)               | 4(19)                   | 96 ± 2 b         | 0 ± 0              |
| <i>Calystegia marginata</i>                | 20160110 | Stored (-18)             | 1.8        | 10m                  | 1m  | 1% bleach, scarified        | 25           | WA              | 14(5)               | 8(22)                   | 73 ± 7 a         | 0 ± 0              |
| <b>Cucurbitaceae</b>                       |          |                          |            |                      |     |                             |              |                 |                     |                         |                  |                    |
| <i>Diplocyclos palmatus</i>                | 20150857 | Dried (15%)              | 3.5        | 2m                   | na  | Scarified                   | 25           | WA              | 10(4)               | 3(14)                   | 40 ± 10 a        | 0 ± 0              |
| <i>Diplocyclos palmatus</i>                | 20150857 | Stored (-18)             | 3.5        | 2m                   | 2m  | 1% bleach, scarified        | 25           | WA              | 10(5)               | 5(12)                   | 76 ± 10 b        | 16 ± 9             |
| <i>Neoachmandra cunninghamii</i>           | 20150533 | Dried (15%)              | 7.0        | 1m                   | na  | None                        | 20           | GA <sub>3</sub> | 10(5)               | 6(23)                   | 36 ± 7 a         | 18 ± 7             |
| <i>Neoachmandra cunninghamii</i>           | 20150533 | Stored (-18)             | 7.0        | 1m                   | 5m  | None                        | 20           | GA <sub>3</sub> | 10(3)               | 11(21)                  | 83 ± 7 b         | 13 ± 3             |
| <i>Neoachmandra cunninghamii</i>           | 20160116 | Fresh                    | 9.8        | na                   | na  | None                        | 25           | WA              | 10(5)               | 9(51)                   | 87 ± 4 a         | 2 ± 2              |
| <i>Neoachmandra cunninghamii</i>           | 20160116 | Dried (15%)              | 2.8        | 1m                   | na  | None                        | 25           | WA              | 8(5)                | 8(22)                   | 80 ± 9 a         | 9 ± 4              |
| <i>Neoachmandra cunninghamii</i>           | 20160116 | Stored (-18)             | 2.8        | 1m                   | 1m  | None                        | 25           | WA              | 10(5)               | 6(34)                   | 86 ± 2 a         | 0 ± 0              |
| <b>Cunoniaceae</b>                         |          |                          |            |                      |     |                             |              |                 |                     |                         |                  |                    |
| <i>Ackama paniculosa</i>                   | 20120178 | Dried (15%)              | nd         | 38m                  | na  | None                        | 20           | WA              | 17(5)               | 7(38)                   | 82 ± 9 a         | 4 ± 2              |
| <i>Ackama paniculosa</i>                   | 20120178 | Stored (-18)             | nd         | 4m                   | 18m | None                        | 20           | WA              | 20(5)               | 9(26)                   | 84 ± 3 a         | 0 ± 0              |
| <i>Ceratopetalum apetalum</i>              | 20140021 | Fresh                    | 62.7       | na                   | na  | Whole fruit sown            | 20           | GA <sub>3</sub> | 10(5)               | 5(9)                    | 96 ± 2 a         | 0 ± 0              |
| <i>Ceratopetalum apetalum</i>              | 20140021 | Dried (15%)              | 4.6        | 3m                   | na  | Whole fruit sown            | 20           | GA <sub>3</sub> | 10(5)               | 13(19)                  | 42 ± 5 b         | 0 ± 0              |

| Species                         | Acc No.  | Storage treatments    |         |                   |     | Germination conditions |                    |                 | Germination results |                      |               |                 |
|---------------------------------|----------|-----------------------|---------|-------------------|-----|------------------------|--------------------|-----------------|---------------------|----------------------|---------------|-----------------|
|                                 |          | Treatment (%RH or °C) | SMC (%) | Duration (months) |     | Pre-treatment          | Temp (°C)          | Media           | No. seeds (reps)    | Days to first (last) | Germ (% ± se) | Viable (% ± se) |
| <i>Ceratopetalum gummiferum</i> | 20070050 | Dried (15%)           | 4.9     | 17m               | na  | Whole fruit sown       | 20                 | WA              | 10(5)               | 11(29)               | 98 ± 2 a      | 0 ± 0           |
| <i>Ceratopetalum gummiferum</i> | 20070050 | Stored (-18)          | 4.9     | 6m                | 90m | Whole fruit sown       | 20                 | WA              | 10(5)               | 13(59)               | 88 ± 4 b      | 13 ± 6          |
| <i>Davidsonia pruriens</i>      | 20160368 | Fresh                 | 51.5    | na                | na  | None                   | 25                 | Prop mix        | 51(1)               | 12(39)               | 92 a          | 0 ± 0           |
| <i>Davidsonia pruriens</i>      | 20160368 | Dried (15%)           | 4.5     | 2m                | na  | None                   | 25                 | Prop mix        | 50(1)               | na                   | 0 b           | 0 ± 0           |
| <i>Karrabina benthamiana</i>    | 20141386 | Fresh                 | nd      | na                | na  | None                   | 20                 | GA <sub>3</sub> | 10(5)               | 14(80)               | 64 ± 11 a     | 2 ± 2           |
| <i>Karrabina benthamiana</i>    | 20141386 | Dried (15%)           | 3.1     | 5m                | na  | None                   | 20                 | GA <sub>3</sub> | 9(5)                | 11(45)               | 74 ± 5 a      | 0 ± 0           |
| <i>Karrabina benthamiana</i>    | 20141386 | Stored (-18)          | 3.1     | 5m                | 3m  | None                   | 20                 | GA <sub>3</sub> | 10(5)               | 14(63)               | 83 ± 9 a      | 0 ± 0           |
| <i>Vesselowskya rubifolia</i>   | 20160108 | Fresh                 | nd      | na                | na  | None                   | 25                 | WA              | 10(5)               | 4(16)                | 98 ± 2 ab     | 2 ± 2           |
| <i>Vesselowskya rubifolia</i>   | 20160108 | Dried (15%)           | nd      | 1m                | na  | None                   | 25                 | WA              | 15(5)               | 8(8)                 | 100 ± 0 a     | 0 ± 0           |
| <i>Vesselowskya rubifolia</i>   | 20160108 | Stored (-18)          | nd      | 1m                | 2m  | None                   | 25                 | WA              | 15(5)               | 8(29)                | 92 ± 3 b      | 6 ± 3           |
| <i>Vesselowskya venusta</i>     | 20140496 | Dried (15%)           | 3.8     | 1m                | na  | None                   | 20                 | GA <sub>3</sub> | 9(5)                | 14(24)               | 80 ± 7 a      | 0 ± 0           |
| <i>Vesselowskya venusta</i>     | 20140496 | Stored (-18)          | 3.8     | 1m                | 3m  | None                   | 20                 | GA <sub>3</sub> | 10(5)               | 5(18)                | 88 ± 7 a      | 2 ± 2           |
| <b>Cyperaceae</b>               |          |                       |         |                   |     |                        |                    |                 |                     |                      |               |                 |
| <i>Cyperus gracilis</i>         | 20130252 | Stored (-18)          | 5.9     | 3m                | 36m | None                   | 25                 | WA              | 11(5)               | 20(111)              | 80 ± 6        | 2 ± 2           |
| <b>Dilleniaceae</b>             |          |                       |         |                   |     |                        |                    |                 |                     |                      |               |                 |
| <i>Hibbertia scandens</i>       | 20150329 | Dried (15%)           | 5.5     | 3m                | na  | None                   | 20                 | GA <sub>3</sub> | 7(3)                | 35(71)               | 84 ± 8 a      | 0 ± 0           |
| <b>Dioscoreaceae</b>            |          |                       |         |                   |     |                        |                    |                 |                     |                      |               |                 |
| <i>Dioscorea transversa</i>     | 20120467 | Dried (15%)           | 4.5     | 2m                | na  | None                   | 20                 | WA              | 10(1)               | 23(65)               | 30            | 7               |
| <i>Dioscorea transversa</i>     | 20120467 | Stored (-18)          | 4.5     | 2m                | 4y  | None                   | 25                 | WA              | 10(5)               | 13(26)               | 72 ± 5        | 28 ± 0          |
| <b>Ebenaceae</b>                |          |                       |         |                   |     |                        |                    |                 |                     |                      |               |                 |
| <i>Diospyros australis</i>      | 20140276 | Fresh                 | 54.4    | na                | na  | 2% bleach              | 25/13 <sup>c</sup> | Prop mix        | 50(1)               | 26(96)               | 74 a          | 12              |
| <i>Diospyros australis</i>      | 20140276 | Dried (15%)           | 4.8     | 5m                | na  | 2% bleach              | 28/16 <sup>c</sup> | Prop mix        | 50(1)               | 66(66)               | 2 b           | 0               |
| <i>Diospyros fasciculosa</i>    | 20150519 | Fresh                 | 42.5    | na                | na  | None                   | 20                 | Prop mix        | 50(1)               | 116(214)             | 100 a         | 0               |
| <i>Diospyros fasciculosa</i>    | 20150519 | Dried (15%)           | 4.9     | 4m                | na  | None                   | 20                 | Prop mix        | 40(1)               | 78(189)              | 78 b          | 0               |
| <i>Diospyros fasciculosa</i>    | 20150519 | Stored (-18)          | 4.9     | 4m                | 3m  | None                   | 20 <sup>d</sup>    | Prop mix        | 40(1)               | 57(203)              | 45 b          | 3               |
| <i>Diospyros mabacea</i>        | 20130080 | Fresh                 | 58.0    | na                | na  | None                   | 25                 | GA <sub>3</sub> | 6(3)                | 27(80)               | 61 ± 20 a     | 17 ± 10         |
| <i>Diospyros mabacea</i>        | 20130080 | Dried (15%)           | 4.5     | 3m                | na  | None                   | 25                 | GA <sub>3</sub> | 7(3)                | na                   | 0 ± 0 b       | 15 ± 1          |

| Species                         | Acc No.  | Storage treatments    |         |                   |    | Germination conditions |                    |                 | Germination results |                      |               |                 |
|---------------------------------|----------|-----------------------|---------|-------------------|----|------------------------|--------------------|-----------------|---------------------|----------------------|---------------|-----------------|
|                                 |          | Treatment (%RH or °C) | SMC (%) | Duration (months) |    | Pre-treatment          | Temp (°C)          | Media           | No. seeds (reps)    | Days to first (last) | Germ (% ± se) | Viable (% ± se) |
| <i>Diospyros pentamera</i>      | 20180104 | Fresh                 | 23.4    | na                | na | None                   | 20                 | Prop mix        | 10(3)               | 89(648)              | 73 ± 7 a      | 10 ± 6          |
| <i>Diospyros pentamera</i>      | 20180104 | Dried (15%)           | 6.5     | 1m                | na | None                   | 20                 | Prop mix        | 10(3)               | 68(491)              | 30 ± 6 b      | 30 ± 10         |
| <i>Diospyros pentamera</i>      | 20180104 | Stored (-18)          | 6.5     | 1m                | 1m | None                   | 20                 | Prop mix        | 10(3)               | 92(480)              | 50 ± 6 ab     | 10 ± 6          |
| <b>Elaeocarpaceae</b>           |          |                       |         |                   |    |                        |                    |                 |                     |                      |               |                 |
| <i>Elaeocarpus obovatus</i>     | 20190106 | Fresh                 | 29.4    | na                | na | Endocarp removed       | 20                 | GA <sub>3</sub> | 10(5)               | 21(64)               | 60 ± 6 a      | 0 ± 0           |
| <i>Elaeocarpus obovatus</i>     | 20190106 | Dried (15%)           | 4.1     | 1m                | na | Endocarp removed       | 20                 | GA <sub>3</sub> | 10(5)               | na                   | 0 ± 0 b       | 0 ± 0           |
| <i>Sloanea australis</i>        | 20140058 | Fresh                 | 9.7     | na                | na | 4% bleach              | 20                 | GA <sub>3</sub> | 10(5)               | 14(66)               | 92 ± 4 a      | 2 ± 2           |
| <i>Sloanea australis</i>        | 20140058 | Dried (15%)           | 3.4     | 2m                | na | 4% bleach              | 20                 | GA <sub>3</sub> | 10(5)               | na                   | 0 ± 0 b       | 0 ± 0           |
| <b>Escalloniaceae</b>           |          |                       |         |                   |    |                        |                    |                 |                     |                      |               |                 |
| <i>Anopterus macleayanus</i>    | 20131006 | Dried (15%)           | 3.2     | 3m                | na | None                   | 25                 | WA              | 10(5)               | 24(41)               | 75 ± 7 a      | 6 ± 4           |
| <i>Anopterus macleayanus</i>    | 20131006 | Stored (-18)          | 3.2     | 3m                | 2m | None                   | 25                 | Prop mix        | 10(5)               | 41(97)               | 78 ± 10 a     | 0 ± 0           |
| <b>Euphorbiaceae</b>            |          |                       |         |                   |    |                        |                    |                 |                     |                      |               |                 |
| <i>Acalypha capillipes</i>      | 20150331 | Dried (15%)           | nd      | 6m                | na | None                   | 25                 | WA              | 10(1)               | 4(4)                 | 100           | 0 ± 0           |
| <i>Acalypha capillipes</i>      | 20150331 | Stored (-18)          | nd      | 6m                | 2m | None                   | 25                 | WA              | 10(1)               | 6(6)                 | 40            | 0 ± 0           |
| <i>Baloghia inophylla</i>       | 20141699 | Dried (15%)           | 3.9     | 5m                | na | None                   | 20                 | GA <sub>3</sub> | 10(5)               | 26(127)              | 64 ± 5 a      | 4 ± 4           |
| <i>Baloghia inophylla</i>       | 20141699 | Stored (-18)          | ≤ 3.9   | 8m                | 2m | 2% bleach              | 20                 | GA <sub>3</sub> | 10(4)               | 60(60)               | 12 ± 10 b     | 4 ± 4           |
| <i>Fontainea australis</i>      | 20120964 | Fresh                 | nd      | na                | na | Endocarp removed       | 25                 | WA              | 8(3)                | 7(48)                | 100 ± 0 a     | 0 ± 0           |
| <i>Fontainea australis</i>      | 20120964 | Dried (15%)           | 3.4     | 5m                | na | Endocarp removed       | 25                 | GA <sub>3</sub> | 4(4)                | 23(37)               | 25 ± 14 b     | 0 ± 0           |
| <i>Fontainea oraria</i>         | Sans No. | Fresh                 | nd      | na                | na | Endocarp removed       | 25                 | Prop mix        | 21(1)               | 28(161)              | 100 a         | 0               |
| <i>Fontainea oraria</i>         | Sans No. | Dried (15%)           | nd      | 3m                | na | Endocarp removed       | 25                 | Prop mix        | 24(1)               | 26(64)               | 46 b          | 0               |
| <b>Fabaceae</b>                 |          |                       |         |                   |    |                        |                    |                 |                     |                      |               |                 |
| <i>Archidendron hendersonii</i> | 20120967 | Fresh                 | 60.2    | na                | na | None                   | 25                 | WA              | 10(3)               | 5(5)                 | 100 ± 0 a     | 0 ± 0           |
| <i>Archidendron hendersonii</i> | 20120967 | Dried (15%)           | 5.7     | 3m                | na | None                   | 25                 | WA              | 10(3)               | na                   | 0 ± 0 b       | 0 ± 0           |
| <i>Callerya megasperma</i>      | 20130268 | Fresh                 | nd      | na                | na | None                   | 25                 | WA              | 10(1)               | na                   | 0             | NR              |
| <i>Callerya megasperma</i>      | 20130268 | Dried (15%)           | 3.6     | 3m                | na | None                   | 23/11 <sup>c</sup> | Prop mix        | 5(1)                | 22(57)               | 60            | NR              |
| <i>Callerya megasperma</i>      | 20160120 | Fresh                 | 52.9    | na                | na | None                   | 25                 | Prop mix        | 12(1)               | 28(206)              | 83 a          | 0               |
| <i>Callerya megasperma</i>      | 20160120 | Dried (47%)           | 43.2    | 1m                | na | None                   | 25                 | Prop mix        | 10(1)               | 48(139)              | 100 a         | 0               |
| <i>Callerya megasperma</i>      | 20160128 | Fresh                 | nd      | na                | na | None                   | 25                 | Prop mix        | 4(1)                | 45(59)               | 75 a          | 0               |
| <i>Callerya megasperma</i>      | 20160128 | Dried (15%)           | nd      | 1m                | na | None                   | 25                 | Prop mix        | 4(1)                | 22(128)              | 75 a          | 0               |

| Species                          | Acc No.  | Storage treatments    |         |                   |     | Germination conditions |                    |                 | Germination results |                      |               |                 |
|----------------------------------|----------|-----------------------|---------|-------------------|-----|------------------------|--------------------|-----------------|---------------------|----------------------|---------------|-----------------|
|                                  |          | Treatment (%RH or °C) | SMC (%) | Duration (months) |     | Pre-treatment          | Temp (°C)          | Media           | No. seeds (reps)    | Days to first (last) | Germ (% ± se) | Viable (% ± se) |
| <i>Desmodium acanthocladum</i>   | 20120201 | Fresh                 | 40.3    | na                | na  | None                   | 25                 | WA              | 10(5)               | 3(17)                | 96 ± 2 a      | 0 ± 0           |
| <i>Desmodium acanthocladum</i>   | 20120201 | Dried (15%)           | 3.0     | 1m                | na  | None                   | 25                 | WA              | 10(5)               | 2(16)                | 92 ± 2 a      | 0 ± 0           |
| <i>Desmodium acanthocladum</i>   | 20120184 | Stored (-18)          | nd      | 6m                | 50m | Scarified              | 25                 | WA              | 8(5)                | 7(50)                | 70 ± 12       | 0 ± 0           |
| <i>Mucuna gigantea</i>           | 20120451 | Stored (-18)          | 2.6     | 1m                | 48m | Scarified              | 25                 | Prop mix        | 46(1)               | 14(16)               | 100           | 0               |
| <i>Pararchidendron pruinatum</i> | 20180334 | Fresh                 | 6.4     | na                | na  | Scarified              | 20                 | WA              | 10(5)               | 14(14)               | 86 ± 5 a      | 0 ± 0           |
| <i>Pararchidendron pruinatum</i> | 20180334 | Dried (15%)           | 3.6     | 0.5m              | na  | Scarified              | 20                 | WA              | 15(5)               | 6(13)                | 83 ± 3 a      | 0 ± 0           |
| <i>Pararchidendron pruinatum</i> | 20180334 | Stored (-18)          | 3.6     | 0.5m              | 1m  | Scarified              | 20                 | WA              | 10(5)               | 8(22)                | 78 ± 6 a      | 10 ± 3          |
| <i>Senna acclinis</i>            | 20131519 | Stored (-18)          | 4.3     | 7m                | 26m | Scarified              | 20                 | WA              | 11(5)               | 7(14)                | 92 ± 6        | 0 ± 0           |
| <i>Senna barronfieldii</i>       | 20081315 | Dried (15%)           | 4.9     | ~60m              | na  | None                   | 25                 | GA <sub>3</sub> | 10(5)               | 6(8)                 | 80 ± 4        | 0 ± 0           |
| <b>Gesneriaceae</b>              |          |                       |         |                   |     |                        |                    |                 |                     |                      |               |                 |
| <i>Fieldia australis</i>         | 20150521 | Fresh                 | nd      | na                | na  | None                   | 20                 | GA <sub>3</sub> | 9(5)                | 22(93)               | 94 ± 3 a      | 6 ± 3           |
| <i>Fieldia australis</i>         | 20150521 | Dried (15%)           | 2.2     | 3m                | na  | None                   | 25                 | GA <sub>3</sub> | 9(5)                | 15(101)              | 92 ± 4 a      | 8 ± 4           |
| <i>Fieldia australis</i>         | 20150521 | Stored (-18)          | 2.2     | 3m                | 2m  | None                   | 25                 | GA <sub>3</sub> | 9(5)                | 22(127)              | 100 ± 0 a     | 0 ± 0           |
| <b>Hemerocallidaceae</b>         |          |                       |         |                   |     |                        |                    |                 |                     |                      |               |                 |
| <i>Geitonoplesium cymosum</i>    | 20131015 | Fresh                 | 28.8    | na                | na  | 0.5% bleach            | 25                 | GA <sub>3</sub> | 10(5)               | 10(266)              | 38 ± 10 a     | 48 ± 12         |
| <i>Geitonoplesium cymosum</i>    | 20131015 | Dried (15%)           | 3.8     | 2m                | ns  | 0.5% bleach            | 25                 | GA <sub>3</sub> | 10(5)               | 48(318)              | 66 ± 5 a      | 34 ± 5          |
| <b>Lamiaceae</b>                 |          |                       |         |                   |     |                        |                    |                 |                     |                      |               |                 |
| <i>Callicarpa pedunculata</i>    | 20120503 | Fresh                 | 27.3    | na                | na  | None                   | 25                 | GA <sub>3</sub> | 10(5)               | 13(27)               | 66 ± 8 a      | 0 ± 0           |
| <i>Callicarpa pedunculata</i>    | 20120503 | Moist (99%)           | 23.6    | 1m moist          | na  | None                   | 25                 | GA <sub>3</sub> | 10(5)               | 10(42)               | 92 ± 4 b      | 2 ± 2           |
| <i>Callicarpa pedunculata</i>    | 20120503 | Dried (14%)           | 5.8     | 1m                | na  | None                   | 25                 | GA <sub>3</sub> | 10(5)               | 19(28)               | 54 ± 6 a      | 0 ± 0           |
| <i>Callicarpa pedunculata</i>    | 20120503 | Stored (-18)          | 5.8     | 1m                | 9m  | None                   | 25                 | GA <sub>3</sub> | 10(5)               | 14(117)              | 31 ± 5 c      | 0 ± 0           |
| <i>Callicarpa pedunculata</i>    | 20120503 | Stored (-18)          | 5.8     | 1m                | 44m | None                   | 25                 | GA <sub>3</sub> | 10(5)               | 26(125)              | 16 ± 6 c      | 3 ± 3           |
| <i>Clerodendrum floribundum</i>  | 20150328 | Fresh                 | 30.2    | na                | na  | None                   | 28/16 <sup>c</sup> | Prop mix        | 50(1)               | 13(46)               | 98            | 0               |
| <i>Clerodendrum floribundum</i>  | 20150328 | Dried (15%)           | 3.2     | 4m                | na  | None                   | 20                 | GA <sub>3</sub> | 10(5)               | 6(43)                | 50 ± 3        | 0 ± 0           |
| <i>Clerodendrum floribundum</i>  | 20150328 | Stored (-18)          | ≤ 3.2   | 6m                | 4m  | None                   | 20 <sup>d</sup>    | Prop mix        | 10(1)               | 20(29)               | 30            | 0               |
| <i>Gmelina leichhardtii</i>      | Sans No. | Fresh                 | 40.8    | na                | na  | 2 weeks aging outdoors | 24/13 <sup>c</sup> | Prop mix        | 45(1)               | 27(105)              | 84 a          | 11              |
| <i>Gmelina leichhardtii</i>      | Sans No. | Dried (15%)           | 3.6     | 2m                | na  | None                   | 24/13 <sup>c</sup> | Prop mix        | 50(1)               | 57(115)              | 74 a          | 22              |
| <i>Gmelina leichhardtii</i>      | 20150341 | Stored (-18)          | nd      | 4m                | 4m  | None                   | 20 <sup>d</sup>    | Prop mix        | 44(1)               | na                   | 0 b           | 2               |

| Species                       | Acc No.  | Storage treatments    |         |                   |     | Germination conditions |                    |                 | Germination results |                      |               |                 |
|-------------------------------|----------|-----------------------|---------|-------------------|-----|------------------------|--------------------|-----------------|---------------------|----------------------|---------------|-----------------|
|                               |          | Treatment (%RH or °C) | SMC (%) | Duration (months) |     | Pre-treatment          | Temp (°C)          | Media           | No. seeds (reps)    | Days to first (last) | Germ (% ± se) | Viable (% ± se) |
| <i>Plectranthus nitidus</i>   | 20150423 | Dried (15%)           | 5.2     | 4m                | na  | None                   | 25                 | WA              | 10(5)               | 4(25)                | 94 ± 2 a      | 0 ± 0           |
| <i>Plectranthus nitidus</i>   | 20150423 | Stored (-18)          | 5.2     | 4m                | 2m  | None                   | 25                 | WA              | 10(5)               | 6(14)                | 94 ± 4 a      | 0 ± 0           |
| <b>Lauraceae</b>              |          |                       |         |                   |     |                        |                    |                 |                     |                      |               |                 |
| <i>Cinnamomum oliveri</i>     | 20140025 | Fresh                 | nd      | na                | na  | 2% bleach              | 20                 | GA <sub>3</sub> | 10(5)               | 7(56)                | 86 ± 7 a      | 0 ± 0           |
| <i>Cinnamomum oliveri</i>     | 20140025 | Dried (15%)           | 2.3     | 2m                | na  | 2% bleach              | 20                 | GA <sub>3</sub> | 10(5)               | na                   | 0 ± 0 b       | 0 ± 0           |
| <i>Cryptocarya laevigata</i>  | 861640   | Fresh                 | 49.8    | na                | na  | None                   | 25                 | Prop mix        | 10(3)               | 45(151)              | 97 ± 3 a      | 0 ± 0           |
| <i>Cryptocarya laevigata</i>  | 861640   | Dried (60%)           | 39.5    | 0.5m              | na  | None                   | 25                 | Prop mix        | 10(3)               | 43(105)              | 83 ± 3 a      | 0 ± 0           |
| <i>Cryptocarya laevigata</i>  | 861640   | Dried (18%)           | 14.2    | 2m                | na  | None                   | 25                 | Prop mix        | 10(3)               | 58(86)               | 10 ± 6 b      | 0 ± 0           |
| <i>Cryptocarya microneura</i> | 20140305 | Fresh                 | 60.3    | na                | na  | Endocarp removed       | 25/13 <sup>c</sup> | Prop mix        | 50(1)               | 15(57)               | 96 a          | nd              |
| <i>Cryptocarya microneura</i> | 20140305 | Dried (69%)           | 42.2    | <1m               | na  | Endocarp removed       | 25/14 <sup>c</sup> | Prop mix        | 50(1)               | 11(43)               | 100           | 0               |
| <i>Cryptocarya microneura</i> | 20140305 | Dried (50%)           | 38.1    | 1m                | na  | Endocarp removed       | 23/11 <sup>c</sup> | Prop mix        | 50(1)               | 23(41)               | 94 a          | nd              |
| <i>Cryptocarya microneura</i> | 20140305 | Dried (40%)           | 35.6    | 1m                | na  | Endocarp removed       | 24/12 <sup>c</sup> | Prop mix        | 50(1)               | 21(52)               | 70            | 0               |
| <i>Cryptocarya microneura</i> | 20140305 | Dried (27%)           | 32.3    | 3m                | na  | Endocarp removed       | 25/13 <sup>c</sup> | Prop mix        | 50(1)               | 21(101)              | 80 a          | 14              |
| <i>Cryptocarya rigida</i>     | 20130075 | Fresh                 | 58.9    | na                | na  | None                   | 25                 | GA <sub>3</sub> | 10(5)               | 10(199)              | 98 ± 2 a      | 0 ± 0           |
| <i>Cryptocarya rigida</i>     | 20130075 | Dried (15%)           | 4.9     | 4m                | na  | None                   | 25                 | GA <sub>3</sub> | 10(5)               | na                   | 0 ± 0 b       | 0 ± 0           |
| <i>Endiandra introrsa</i>     | 20170018 | Fresh                 | 30.7    | na                | na  | 3 seeds scarified      | 25                 | Prop mix        | 8(1)                | 21(84)               | 100 a         | 0               |
| <i>Endiandra introrsa</i>     | 20170018 | Dried (47%)           | 16.5    | 4m                | na  | None                   | 25                 | Prop mix        | 8(1)                | na                   | 0 b           | 75              |
| <i>Endiandra introrsa</i>     | 20170018 | Dried (15%)           | 5.5     | 4m                | na  | None                   | 25                 | Prop mix        | 8(1)                | na                   | 0 b           | 0               |
| <i>Litsea reticulata</i>      | 20140026 | Fresh                 | nd      | na                | na  | 2% bleach              | 20                 | GA <sub>3</sub> | 10(5)               | 14(98)               | 100 ± 0 a     | 0 ± 0           |
| <i>Litsea reticulata</i>      | 20140026 | Dried (15%)           | 2.1     | 2m                | na  | 2% bleach              | 20                 | GA <sub>3</sub> | 10(5)               | na                   | 0 ± 0 b       | 58 ± 16         |
| <i>Neolitsea dealbata</i>     | 20131011 | Fresh                 | 34.4    | na                | na  | None                   | 25                 | GA <sub>3</sub> | 10(5)               | 23(51)               | 88 ± 6 a      | 8 ± 4           |
| <i>Neolitsea dealbata</i>     | 20131011 | Dried (15%)           | 2.5     | 3m                | na  | None                   | 25                 | WA?             | 10(5)               | 38(38)               | 2 ± 2 b       | 0 ± 0           |
| <b>Linderniaceae</b>          |          |                       |         |                   |     |                        |                    |                 |                     |                      |               |                 |
| <i>Artanema fimbriatum</i>    | 20130641 | Stored (-18)          | 5.8     | 1m                | 24m | None                   | 20                 | WA              | 10(5)               | 7(21)                | 95 ± 3        | 0 ± 0           |
| <b>Lomandraceae</b>           |          |                       |         |                   |     |                        |                    |                 |                     |                      |               |                 |
| <i>Lomandra spicata</i>       | 20130996 | Fresh                 | 36.9    | na                | na  | None                   | 25                 | GA <sub>3</sub> | 10(5)               | 38(210)              | 94 ± 6 a      | 2 ± 2           |
| <i>Lomandra spicata</i>       | 20130996 | Dried (15%)           | 4.9     | 2m                | na  | None                   | 25                 | GA <sub>3</sub> | 10(5)               | 34(224)              | 76 ± 6 b      | 2 ± 2           |
| <i>Lomandra spicata</i>       | 20130996 | Stored (-18)          | 4.9     | 2m                | 18m | None                   | 25                 | GA <sub>3</sub> | 10(3)               | 31(79)               | 63 ± 3 b      | 20 ± 10         |
| <b>Malvaceae</b>              |          |                       |         |                   |     |                        |                    |                 |                     |                      |               |                 |
| <i>Abutilon oxycarpum</i>     | 20111168 | Dried (15%)           | 5.3     | 5m                | na  | Scarified              | 20                 | WA              | 10(5)               | 2(34)                | 83 ± 7 a      | 17 ± 7          |
| <i>Abutilon oxycarpum</i>     | 20111168 | Stored (-18)          | 5.3     | 6m                | 36m | Scarified              | 20                 | WA              | 10(5)               | 4(11)                | 86 ± 5 a      | 8 ± 2           |



| Species                                 | Acc No.  | Storage treatments    |         |                   |         | Germination conditions |                    |                 | Germination results |                      |               |                 |
|-----------------------------------------|----------|-----------------------|---------|-------------------|---------|------------------------|--------------------|-----------------|---------------------|----------------------|---------------|-----------------|
|                                         |          | Treatment (%RH or °C) | SMC (%) | Duration (months) |         | Pre-treatment          | Temp (°C)          | Media           | No. seeds (reps)    | Days to first (last) | Germ (% ± se) | Viable (% ± se) |
| <i>Argyrodendron actinophyllum</i>      | 20141385 | Fresh                 | 47.0    | na                | na      | None                   | 30/18 <sup>c</sup> | Prop mix        | 7(4)                | 21(79)               | 86 ± 6 a      | 0 ± 0           |
| <i>Argyrodendron actinophyllum</i>      | 20141385 | Dried (15%)           | nd      | 7m                | na      | None                   | 24/14 <sup>c</sup> | Prop mix        | 7(4)                | na                   | 0 b           | 0 ± 0           |
| <i>Argyrodendron trifoliolatum</i>      | 20141392 | Fresh                 | 63.7    | na                | na      | Wing removed           | 30/18 <sup>c</sup> | Prop mix        | 50(1)               | 9(45)                | 64 ± 0 a      | 0 ± 0           |
| <i>Argyrodendron trifoliolatum</i>      | 20141392 | Dried (15%)           | 5.8     | 7m                | na      | None recorded          | 24/14 <sup>c</sup> | Prop mix        | 50(1)               | na                   | 0 ± 0 b       | 0 ± 0           |
| <i>Brachychiton acerifolius</i>         | 20130657 | Fresh                 | 9.9     | na                | na      | None                   | 25                 | GA <sub>3</sub> | 10(5)               | 7(42)                | 100 ± 0 a     | 0 ± 0           |
| <i>Brachychiton acerifolius</i>         | 20130657 | Dried (15%)           | 5.8     | < 1m              | na      | None                   | 25                 | GA <sub>3</sub> | 10(5)               | 10(77)               | 94 ± 2 b      | 0 ± 0           |
| <i>Brachychiton acerifolius</i>         | 20130657 | Stored (+4, -18)      | ≤ 5.8   | 2m                | 37m, 1m | None                   | 20                 | Prop mix        | 10(5)               | 14(195)              | 84 ± 5 b      | 0 ± 0           |
| <i>Brachychiton acerifolius</i>         | 20130657 | Stored (+4)           | ≤ 5.8   | 2m                | 36m     | None                   | 20                 | Prop mix        | 50(1)               | 14(168)              | 93            | 2               |
| <i>Corchorus cunninghamii</i>           | 20150421 | Dried (15%)           | 5.4     | 4m                | na      | Scarified              | 25                 | WA              | 10(4)               | 3(14)                | 83 ± 9 a      | 15 ± 9          |
| <i>Corchorus cunninghamii</i>           | 20150421 | Stored (-18)          | 5.4     | 4m                | 3m      | Scarified              | 25                 | WA              | 10(4)               | 3(27)                | 95 ± 3 a      | 3 ± 3           |
| <i>Sterculia quadrifida</i>             | 20151854 | Fresh                 | 49.4    | na                | na      | None                   | 23                 | Prop mix        | 50(1)               | 6(37)                | 64 a          | 0               |
| <i>Sterculia quadrifida</i>             | 20151854 | Dried (15%)           | 5.1     | 2m                | na      | None                   | 25                 | Prop mix        | 48(1)               | 14(14)               | 4 b           | 2               |
| <b>Melastomataceae</b>                  |          |                       |         |                   |         |                        |                    |                 |                     |                      |               |                 |
| <i>Melastoma affine</i>                 | 20120196 | Dried (15%)           | 7.2     | 3m                | na      | None                   | 25                 | WA              | 20(5)               | 10(70)               | 92 ± 3 a      | 5 ± 2           |
| <i>Melastoma affine</i>                 | 20120196 | Stored (-18)          | 7.2     | 3m                | 28m     | None                   | 25                 | WA              | 10(5)               | 15(67)               | 50 ± 8 b      | 2 ± 2           |
| <i>Melastoma affine</i>                 | 20120196 | Stored (-18)          | 7.2     | 3m                | 47m     | None                   | 25                 | WA              | 13(5)               | 26(124)              | 12 ± 4 c      | 8 ± 6           |
| <b>Meliaceae</b>                        |          |                       |         |                   |         |                        |                    |                 |                     |                      |               |                 |
| <i>Dysoxylum mollissimum</i>            | 20120965 | Fresh                 | 48.9    | na                | na      | None                   | 25                 | WA              | 10(5)               | 8(44)                | 92 ± 8 a      | 0 ± 0           |
| <i>Dysoxylum mollissimum</i>            | 20120965 | Dried (15%)           | 3.8     | 3m                | na      | None                   | 25                 | WA              | 10(5)               | na                   | 0 ± 0 b       | 0 ± 0           |
| <i>Dysoxylum rufum</i>                  | 20141391 | Fresh                 | 65.3    | na                | na      | None                   | 31/18 <sup>c</sup> | Prop mix        | 30(1)               | 25(99)               | 100 a         | 0               |
| <i>Dysoxylum rufum</i>                  | 20141391 | Dried (15%)           | 5.9     | 7m                | na      | None                   | 24/14 <sup>c</sup> | Prop mix        | 35(1)               | na                   | 0 b           | 0               |
| <b>Menispermaceae</b>                   |          |                       |         |                   |         |                        |                    |                 |                     |                      |               |                 |
| <i>Carronia multiselepalea</i>          | 20150863 | Fresh                 | nd      | na                | na      | None                   | 26/16 <sup>c</sup> | Prop mix        | 10(4)               | 40(163)              | 84 ± 2 a      | 0 ± 0           |
| <i>Carronia multiselepalea</i>          | 20150863 | Dried (15%)           | 3.1     | 2m                | na      | None                   | 27/17 <sup>c</sup> | Prop mix        | 9(4)                | na                   | 0 ± 0 b       | 0 ± 0           |
| <i>Stephania japonica var. discolor</i> | 20130064 | Fresh                 | nd      | na                | na      | None                   | 25                 | WA              | 10(5)               | na                   | 0 ± 0 a       | 98 ± 2          |
| <i>Stephania japonica var. discolor</i> | 20130064 | Dried (15%)           | 6.5     | 3m                | na      | None                   | 25                 | GA <sub>3</sub> | 10(5)               | 7(28)                | 100 ± 0 b     | 0 ± 0           |
| <i>Stephania japonica var. discolor</i> | 20130064 | Stored (-18)          | 4.2     | 5m                | 18m     | None                   | 25                 | GA <sub>3</sub> | 10(5)               | 14(14)               | 78 ± 9 c      | 18 ± 7          |
| <b>Monimiaceae</b>                      |          |                       |         |                   |         |                        |                    |                 |                     |                      |               |                 |
| <i>Wilkiea huegeliana*</i>              | 20160130 | Fresh                 | nd      | na                | na      | None                   | 25                 | Prop mix        | 50(1)               | nd                   | 68 a          | 0               |
| <i>Wilkiea huegeliana</i>               | 20160130 | Dried (15%)           | nd      | 2m                | na      | None                   | 25                 | Prop mix        | 50(1)               | na                   | 0 b           | 0               |

| Species                          | Acc No.  | Storage treatments    |         |                   |     | Germination conditions |           |                 | Germination results |                      |               |                 |
|----------------------------------|----------|-----------------------|---------|-------------------|-----|------------------------|-----------|-----------------|---------------------|----------------------|---------------|-----------------|
|                                  |          | Treatment (%RH or °C) | SMC (%) | Duration (months) |     | Pre-treatment          | Temp (°C) | Media           | No. seeds (reps)    | Days to first (last) | Germ (% ± se) | Viable (% ± se) |
| <b>Moraceae</b>                  |          |                       |         |                   |     |                        |           |                 |                     |                      |               |                 |
| <i>Ficus fraseri</i>             | 20160118 | Fresh                 | 8       | na                | na  | 1% bleach              | 25        | WA              | 10(5)               | 8(12)                | 98 ± 2 a      | 2 ± 2           |
| <i>Ficus fraseri</i>             | 20160118 | Dried (15%)           | 3.4     | 2m                | na  | 1% bleach              | 25        | WA              | 9(5)                | 8(15)                | 91 ± 4 a      | 4 ± 3           |
| <i>Ficus fraseri</i>             | 20160118 | Stored (-18)          | 3.4     | 2m                | 1m  | None                   | 25        | WA              | 11(5)               | 9(18)                | 100 ± 0 a     | 0 ± 0           |
| <i>Ficus henneana</i>            | 20150860 | Dried (15%)           | 4.0     | 2m                | na  | None                   | 25        | WA              | 10(5)               | 7(18)                | 94 ± 4 a      | 0 ± 0           |
| <i>Ficus henneana</i>            | 20150860 | Stored (-18)          | 4.0     | 2m                | 2m  | None                   | 25        | WA              | 10(5)               | 6(23)                | 94 ± 4 a      | 2 ± 2           |
| <i>Ficus virens</i>              | 20150861 | Dried (15%)           | 4.5     | 2m                | na  | None                   | 25        | WA              | 10(5)               | 7(18)                | 39 ± 4 a      | 0 ± 0           |
| <i>Ficus virens</i>              | 20150861 | Stored (-18)          | 4.5     | 2m                | 2m  | None                   | 25        | WA              | 8(5)                | 6(13)                | 61 ± 5 b      | 0 ± 0           |
| <i>Ficus watkinsiana</i>         | 20190100 | Fresh                 | 7.4     | na                | na  | None                   | 25        | WA              | 10(5)               | 10(45)               | 61 ± 5 a      | 0 ± 0           |
| <i>Ficus watkinsiana</i>         | 20190100 | Dried (15%)           | 5.1     | 1m                | na  | None                   | 25        | WA              | 10(5)               | 7(28)                | 52 ± 11 a     | 0 ± 0           |
| <i>Ficus watkinsiana</i>         | 20190100 | Stored (-18)          | 5.1     | 1m                | 2m  | None                   | 25        | WA              | 10(5)               | 13(34)               | 78 ± 8 a      | 0 ± 0           |
| <i>Maclura cochinchinensis</i>   | 20140024 | Fresh                 | nd      | na                | na  | 2% bleach              | 20        | GA <sub>3</sub> | 10(5)               | 7(28)                | 54 ± 8 a      | 0 ± 0           |
| <i>Maclura cochinchinensis</i>   | 20140024 | Dried (15%)           | 5.5     | 3m                | na  | 2% bleach              | 20        | GA <sub>3</sub> | 10(5)               | 32(35)               | 4 ± 4 b       | 0 ± 0           |
| <b>Myrtaceae</b>                 |          |                       |         |                   |     |                        |           |                 |                     |                      |               |                 |
| <i>Archirhodomertus beckleri</i> | 20150325 | Fresh                 | 34.1    | na                | na  | None                   | 25        | WA              | 14(5)               | 14(39)               | 97 ± 2 a      | 0 ± 0           |
| <i>Archirhodomertus beckleri</i> | 20150325 | Dried (15%)           | 3.0     | 2m                | na  | None                   | 25        | WA              | 19(5)               | 19(68)               | 98 ± 1 a      | 0 ± 0           |
| <i>Archirhodomertus beckleri</i> | 20150325 | Stored (-18)          | 3.0     | 2m                | 6m  | None                   | 25        | WA              | 15(5)               | 10(62)               | 24 ± 4 b      | 0 ± 0           |
| <i>Austromyrtus dulcis</i>       | 20150518 | Dried (15%)           | < 3.8   | 4m                | na  | None                   | 25        | WA              | 10(5)               | 4(18)                | 100 ± 0 a     | 0 ± 0           |
| <i>Austromyrtus dulcis</i>       | 20150518 | Stored (-18)          | 3.8     | 3m                | 3m  | None                   | 25        | WA              | 10(5)               | 6(23)                | 80 ± 4 b      | 0 ± 0           |
| <i>Backhousia subargentea</i>    | 20150511 | Dried (15%)           | nd      | 2m                | na  | None                   | 20        | GA <sub>3</sub> | 10(5)               | 7(19)                | 90 ± 3        | 0 ± 0           |
| <i>Gossia fragrantissima</i>     | 20150342 | Fresh                 | nd      | na                | na  | None                   | 20        | GA <sub>3</sub> | 10(5)               | 35(143)              | 42 ± 12       | 6 ± 2           |
| <i>Gossia fragrantissima</i>     | 20150342 | Stored (-18)          | nd      | 6m                | 38m | None                   | 25        | WA              | 10(1)               | 33(103)              | 50            | 20              |
| <i>Gossia fragrantissima</i>     | 20150345 | Dried (15%)           | nd      | 6m                | na  | Scarified              | 25        | WA              | 10(1)               | 11(11)               | 40            | 10              |
| <i>Gossia fragrantissima</i>     | 20150345 | Stored (-18)          | nd      | 6m                | 3m  | Scarified              | 25        | WA              | 10(1)               | 22(36)               | 60            | 0               |
| <i>Gossia fragrantissima</i>     | 20150345 | Stored (-18)          | nd      | 6m                | 3m  | None                   | 25        | WA              | 10(1)               | 22(47)               | 80            | 0               |
| <i>Lenwebbia prominens</i>       | 20140299 | Fresh                 | 12.8    | na                | na  | 2% bleach              | 20        | GA <sub>3</sub> | 8(5)                | 23(114)              | 94 ± 4 a      | 4 ± 4           |
| <i>Lenwebbia prominens</i>       | 20140299 | Stored (-18)          | 2.2     | 2m                | 6m  | None                   | 20        | GA <sub>3</sub> | 9(5)                | 38(84)               | 13 ± 4 b      | 4 ± 3           |
| <i>Lenwebbia prominens</i>       | 20150529 | Dried (15%)           | nd      | < 1m              | na  | None                   | 20        | GA <sub>3</sub> | 10(5)               | 26(105)              | 79 ± 3 a      | 21 ± 3          |
| <i>Lenwebbia prominens</i>       | 20150529 | Stored (-18)          | 2.8     | 3m                | 8m  | None                   | 20        | GA <sub>3</sub> | 11(5)               | 34(106)              | 98 ± 2 b      | 2 ± 2           |

| Species                       | Acc No.  | Storage treatments    |         |                   |          | Germination conditions |           |                 | Germination results |                      |               |                 |
|-------------------------------|----------|-----------------------|---------|-------------------|----------|------------------------|-----------|-----------------|---------------------|----------------------|---------------|-----------------|
|                               |          | Treatment (%RH or °C) | SMC (%) | Duration (months) |          | Pre-treatment          | Temp (°C) | Media           | No. seeds (reps)    | Days to first (last) | Germ (% ± se) | Viable (% ± se) |
| <i>Pilidiostigma glabrum</i>  | 20130258 | Fresh                 | nd      | na                | na       | None                   | 25        | WA              | 9(3)                | 15(32)               | 93 ± 4 a      | 0 ± 0           |
| <i>Pilidiostigma glabrum</i>  | 20130258 | Dried (15%)           | 5.9     | 3m                | na       | None                   | 25        | GA <sub>3</sub> | 10(3)               | na                   | 0 ± 0 b       | 0 ± 0           |
| <i>Pilidiostigma glabrum</i>  | 20180197 | Fresh                 | 44.0    | na                | na       | None                   | 25        | WA              | 10(3)               | 14(35)               | 100 ± 0 a     | 0 ± 0           |
| <i>Pilidiostigma glabrum</i>  | 20180197 | Moist stored          | nd      | na                | 1m Fr    | None                   | 25        | WA              | 10(3)               | 26(50)               | 93 ± 3 a      | 7 ± 3           |
| <i>Pilidiostigma glabrum</i>  | 20180197 | Dried (67%)           | 22.3    | 1m                | na       | None                   | 25        | WA              | 10(3)               | 54(54)               | 7 ± 3 b       | 3 ± 3           |
| <i>Rhodamnia maideniana</i>   | 20131013 | Fresh                 | 49.4    | na                | na       | None                   | 25        | GA <sub>3</sub> | 10(5)               | 17(45)               | 89 ± 3 a      | 0 ± 0           |
| <i>Rhodamnia maideniana</i>   | 20131013 | Dried (15%)           | 3.9     | 2m                | na       | None                   | 25        | GA <sub>3</sub> | 10(5)               | 15(53)               | 86 ± 4 a      | 0 ± 0           |
| <i>Rhodamnia maideniana</i>   | 20131013 | Stored (-18)          | ≤ 3.9   | 4m                | 15m      | None                   | 25        | GA <sub>3</sub> | 10(5)               | na                   | 0 ± 0 b       | 0 ± 0           |
| <i>Rhodamnia rubescens</i>    | 20170001 | Fresh                 | nd      | na                | na       | None                   | 25        | WA              | 10(5)               | 11(78)               | 78 ± 4 a      | 20 ± 4          |
| <i>Rhodamnia rubescens</i>    | 20170001 | Dried (15%)           | 4.9     | 5m                | 3m Fr    | None                   | 25        | WA              | 10(5)               | 11(107)              | 77 ± 7 a      | 4 ± 2           |
| <i>Rhodamnia rubescens</i>    | 20170001 | Stored (-18)          | 4.9     | 5m                | m Fr, 3m | None                   | 25        | WA              | 10(5)               | 32(54)               | 77 ± 7 a      | 2 ± 2           |
| <i>Rhodomyrtus psidioides</i> | 20190429 | Fresh                 | 22.5    | na                | na       | None                   | 25/15     | WA              | 10(5)               | 13(95)               | 89 ± 0 a      | 0 ± 0           |
| <i>Rhodomyrtus psidioides</i> | 20190429 | Dried (15%)           | 3.5     | 1m                | na       | None                   | 25/15     | WA              | 10(5)               | 13(55)               | 100 ± 0 b     | 0 ± 0           |
| <i>Rhodomyrtus psidioides</i> | 20190429 | Stored (-18)          | 3.5     | 1m                | 1m       | None                   | 25/15     | WA              | 10(5)               | 14(48)               | 71 ± 4 c      | 0 ± 0           |
| <i>Rhodomyrtus psidioides</i> | 20190426 | Fresh                 | 26.6    | na                | na       | None                   | 25        | WA              | 10(3)               | 5(35)                | 87 ± 9 a      | 0 ± 0           |
| <i>Rhodomyrtus psidioides</i> | 20190426 | Dried (15%)           | 3.7     | 1m                | na       | None                   | 25        | WA              | 10(3)               | 13(56)               | 100 ± 0 a     | 0 ± 0           |
| <i>Rhodomyrtus psidioides</i> | 20190426 | Stored (-18)          | 3.7     | 1m                | 1m       | None                   | 25        | WA              | 10(3)               | 14(42)               | 23 ± 9 b      | 0 ± 0           |
| <i>Syzygium unipunctatum</i>  | Sans No. | Fresh                 | 50.0    | na                | na       | None                   | 25        | Prop mix        | 8(5)                | 34(112)              | 98 ± 3 a      | 0 ± 0           |
| <i>Syzygium unipunctatum</i>  | Sans No. | Dried (65%)           | 11.2    | 1m                | na       | None                   | 25        | Prop mix        | 8(5)                | na                   | 0 ± 0 b       | 0 ± 0           |
| <i>Syzygium unipunctatum</i>  | Sans No. | Dried (15%)           | 5.5     | 2m                | na       | None                   | 25        | Prop mix        | 8(5)                | na                   | 0 ± 0 b       | 0 ± 0           |
| <i>Uromyrtus australis</i>    | 20140300 | Fresh                 | 24      | na                | na       | 2% bleach              | 20        | GA <sub>3</sub> | 9(5)                | 22(105)              | 84 ± 7 a      | 0 ± 0           |
| <i>Uromyrtus australis</i>    | 20140300 | Dried (15%)           | 2.3     | 3m                | na       | 2% bleach              | 20        | GA <sub>3</sub> | 7(5)                | 28(49)               | 58 ± 10 a     | 14 ± 11         |
| <i>Uromyrtus australis</i>    | 20140300 | Stored (-18)          | 2.3     | 3m                | 27m      | None                   | 20        | GA <sub>3</sub> | 6(5)                | na                   | 0 ± 0 b       | 15 ± 5          |
| <b>Nyctaginaceae</b>          |          |                       |         |                   |          |                        |           |                 |                     |                      |               |                 |
| <i>Pisonia umbellifera</i>    | 20160272 | Fresh                 | 10.9    | na                | na       | None                   | 25        | Prop mix        | 47(1)               | 27(56)               | 98 a          | 0               |
| <i>Pisonia umbellifera</i>    | 20160272 | Dried (15%)           | 5.2     | 3m                | na       | None                   | 25        | Prop mix        | 47(1)               | 22(55)               | 100 a         | 0               |
| <i>Pisonia umbellifera</i>    | 20160272 | Stored (-18)          | 5.2     | 3m                | 1m       | None                   | 25        | Prop mix        | 45(1)               | 9(37)                | 100 a         | 0               |
| <b>Onagraceae</b>             |          |                       |         |                   |          |                        |           |                 |                     |                      |               |                 |
| <i>Ludwigia octovalvis</i>    | 20120455 | Stored (-18)          | 5.3     | 2m                | 36m      | None                   | 20        | WA              | 8(5)                | 7(105)               | 89 ± 5        | 3 ± 3           |

| Species                                        | Acc No.  | Storage treatments    |         |                   |     | Germination conditions |                    |                 | Germination results |                      |               |                 |
|------------------------------------------------|----------|-----------------------|---------|-------------------|-----|------------------------|--------------------|-----------------|---------------------|----------------------|---------------|-----------------|
|                                                |          | Treatment (%RH or °C) | SMC (%) | Duration (months) |     | Pre-treatment          | Temp (°C)          | Media           | No. seeds (reps)    | Days to first (last) | Germ (% ± se) | Viable (% ± se) |
| <b>Paracryphiaceae</b>                         |          |                       |         |                   |     |                        |                    |                 |                     |                      |               |                 |
| <i>Quintinia verdonii</i>                      | 20111164 | Dried (15%)           | 2.2     | 4m                | na  | None                   | 20                 | WA              | 20(5)               | 21(49)               | 89 ± 3 a      | 3 ± 2           |
| <i>Quintinia verdonii</i>                      | 20111164 | Stored (-18)          | 2.2     | 6m                | 24m | None                   | 20                 | WA              | 20(5)               | 19(47)               | 91 ± 3 a      | 6 ± 3           |
| <b>Pennantiaceae</b>                           |          |                       |         |                   |     |                        |                    |                 |                     |                      |               |                 |
| <i>Pennantia cunninghamii</i>                  | 20141734 | Fresh                 | 67.9    | na                | na  | None                   | 31/18 <sup>c</sup> | Prop mix        | 50(1)               | 9(45)                | 84 a          | 0               |
| <i>Pennantia cunninghamii</i>                  | 20141734 | Dried (15%)           | 6.4     | 6m                | na  | None                   | 24/14 <sup>c</sup> | Prop mix        | 50(1)               | na                   | 0 b           | 0 ± 0           |
| <b>Philydraceae</b>                            |          |                       |         |                   |     |                        |                    |                 |                     |                      |               |                 |
| <i>Helmholtzia glaberrima</i>                  | 20120194 | Dried (15%)           | ≤ 4.8   | 30m               | na  | None                   | 25                 | WA              | 8(5)                | 13(35)               | 79 ± 3 a      | 0 ± 0           |
| <i>Helmholtzia glaberrima</i>                  | 20120194 | Stored (-18)          | 4.8     | 3m                | 27m | None                   | 25                 | WA              | 9(5)                | 14(24)               | 96 ± 3 b      | 0 ± 0           |
| <b>Phyllanthaceae</b>                          |          |                       |         |                   |     |                        |                    |                 |                     |                      |               |                 |
| <i>Cleistanthus cunninghamii</i>               | 20141707 | Dried (15%)           | 1.6     | 2m                | na  | None                   | 28/17 <sup>c</sup> | Prop mix        | 50(1)               | 28(28)               | 84            | 0               |
| <i>Cleistanthus cunninghamii</i>               | 20141707 | Stored (-18)          | 1.6     | 2m                | 53m | None                   | 25                 | Prop mix        | 8(5)                | 11(33)               | 90 ± 5        | 0 ± 0           |
| <b>Piperaceae</b>                              |          |                       |         |                   |     |                        |                    |                 |                     |                      |               |                 |
| <i>Piper hederaceum</i> var. <i>hederaceum</i> | 20130071 | Fresh                 | nd      | na                | na  | None                   | 25                 | WA              | 10(5)               | 7(10)                | 98 ± 2 a      | 0 ± 0           |
| <i>Piper hederaceum</i> var. <i>hederaceum</i> | 20130071 | Dried (15%)           | 4.3     | 4m                | na  | None                   | 25                 | WA              | 10(5)               | na                   | 0 ± 0 b       | 0 ± 0           |
| <i>Piper hederaceum</i> var. <i>hederaceum</i> | 20170038 | Fresh                 | 51.8    | na                | na  | None                   | 25                 | Prop mix        | 10(5)               | 28(96)               | 64 ± 8 a      | 0 ± 0           |
| <i>Piper hederaceum</i> var. <i>hederaceum</i> | 20170038 | Dried (47%)           | 8.0     | 1m                | na  | None                   | 25                 | Prop mix        | 10(5)               | 53(53)               | 2 ± 2 b       | 0 ± 0           |
| <i>Piper hederaceum</i> var. <i>hederaceum</i> | 20170038 | Dried (15%)           | 6.5     | 1m                | na  | None                   | 25                 | Prop mix        | 10(5)               | na                   | 0 ± 0 b       | 0 ± 0           |
| <b>Pittosporaceae</b>                          |          |                       |         |                   |     |                        |                    |                 |                     |                      |               |                 |
| <i>Hymenosporum flavum</i>                     | 20140420 | Fresh                 | 26.0    | na                | na  | None                   | 20                 | GA <sub>3</sub> | 9(5)                | 24(35)               | 33 ± 5 a      | 0 ± 0           |
| <i>Hymenosporum flavum</i>                     | 20140420 | Dried (15%)           | 8.0     | 2m                | na  | None                   | 20                 | GA <sub>3</sub> | 8(5)                | 24(45)               | 91 ± 6 b      | 0 ± 0           |
| <i>Hymenosporum flavum</i>                     | 20140420 | Stored (-18)          | 8.0     | 2m                | 3m  | None                   | 20                 | GA <sub>3</sub> | 9(5)                | 20(43)               | 65 ± 8 c      | 2 ± 2           |
| <i>Hymenosporum flavum</i>                     | 20140420 | Stored (-18)          | 8.0     | 2m                | 22m | None                   | 20                 | GA <sub>3</sub> | 6(5)                | 26(66)               | 73 ± 7 cb     | 3 ± 3           |
| <i>Pittosporum angustifolium</i>               | 20190207 | Fresh                 | 58.9    | na                | na  | None                   | 25                 | WA              | 10(5)               | 34(41)               | 8 ± 5 a       | 0 ± 0           |
| <i>Pittosporum angustifolium</i>               | 20190207 | Dried (15%)           | 5.2     | 1m                | na  | Seed coating abraded   | 25                 | WA              | 10(5)               | 27(55)               | 60 ± 6 b      | 0 ± 0           |
| <i>Pittosporum angustifolium</i>               | 20190207 | Stored (-18)          | 5.5     | 1m                | 1m  | Seed coating abraded   | 25                 | WA              | 10(5)               | 22(58)               | 66 ± 7 b      | 0 ± 0           |
| <i>Pittosporum lancifolium</i>                 | 20150505 | Fresh                 | 44.6    | na                | na  | 1% bleach              | 20                 | GA <sub>3</sub> | 10(5)               | 21(27)               | 84 ± 7 a      | 0 ± 0           |
| <i>Pittosporum lancifolium</i>                 | 20150505 | Dried (15%)           | 4.3     | 3m                | na  | 1% bleach              | 20                 | GA <sub>3</sub> | 10(5)               | 23(38)               | 86 ± 4 a      | 0 ± 0           |
| <i>Pittosporum lancifolium</i>                 | 20150505 | Dried (15%)           | 4.3     | 3m                | na  | None                   | 20                 | WA              | 10(5)               | 25(32)               | 98 ± 2 a      | 2 ± 2           |
| <i>Pittosporum lancifolium</i>                 | 20150505 | Stored (-18)          | 4.3     | 3m                | 2m  | None                   | 20                 | WA              | 10(5)               | 30(62)               | 88 ± 4 a      | 6 ± 2           |

| Species                          | Acc No.  | Storage treatments    |         |                     |         | Germination conditions |                    |                 | Germination results |                      |               |                 |
|----------------------------------|----------|-----------------------|---------|---------------------|---------|------------------------|--------------------|-----------------|---------------------|----------------------|---------------|-----------------|
|                                  |          | Treatment (%RH or °C) | SMC (%) | Duration (months)   |         | Pre-treatment          | Temp (°C)          | Media           | No. seeds (reps)    | Days to first (last) | Germ (% ± se) | Viable (% ± se) |
| <i>Pittosporum multiflorum</i>   | 20140859 | Dried (15%)           | ≤ 5.5   | 10m                 | na      | None                   | 20                 | WA              | 10(5)               | 31(59)               | 78 ± 6 a      | 0 ± 0           |
| <i>Pittosporum multiflorum</i>   | 20140859 | Stored (-18)          | 5.5     | 3m                  | 22m     | None                   | 20                 | WA              | 11(5)               | 57(113)              | 25 ± 5 b      | 22 ± 8          |
| <i>Pittosporum multiflorum</i>   | 20160369 | Fresh                 | 35.5    | na                  | na      | None                   | 20                 | WA              | 10(5)               | 43(99)               | 66 ± 11 a     | 8 ± 4           |
| <i>Pittosporum multiflorum</i>   | 20160369 | Dried (15%)           | nd      | 1m                  | na      | None                   | 20                 | WA              | 8(5)                | 37(121)              | 65 ± 8 a      | 4 ± 3           |
| <i>Pittosporum multiflorum</i>   | 20160369 | Stored (-18)          | nd      | 1m                  | 1m      | None                   | 20                 | GA <sub>3</sub> | 8(5)                | 52(52)               | 3 ± 3 b       | 0 ± 0           |
| <b>Poaceae</b>                   |          |                       |         |                     |         |                        |                    |                 |                     |                      |               |                 |
| <i>Entolasia marginata</i>       | 20111224 | Dried (15%)           | ≤ 4.8   | 5m                  | na      | None                   | 25                 | WA              | 10(5)               | 9(63)                | 54 ± 8 a      | 36 ± 8          |
| <i>Entolasia marginata</i>       | 20111224 | Stored (-18)          | 4.8     | 1m                  | 55m     | None                   | 25                 | WA              | 11(5)               | 5(40)                | 87 ± 5 b      | 4 ± 4           |
| <i>Panicum bisulcatum</i>        | 20120448 | Dried (15%)           | nd      | 36m                 | na      | None                   | 20                 | WA              | 20(5)               | 3(12)                | 96 ± 1 a      | 0 ± 0           |
| <i>Panicum bisulcatum</i>        | 20120448 | Stored (-18)          | 4.9     | 3m                  | 18m     | None                   | 20                 | WA              | 20(5)               | 5(14)                | 53 ± 1 b      | 17 ± 2          |
| <i>Panicum bisulcatum</i>        | 20120448 | Stored (-18, -192)    | 4.9     | 3 + 5m <sup>a</sup> | 18m, 1m | None                   | 20                 | WA              | 10(5)               | 5(18)                | 84 ± 4 c      | 2 ± 2           |
| <b>Proteaceae</b>                |          |                       |         |                     |         |                        |                    |                 |                     |                      |               |                 |
| <i>Eidothea hardeniana</i>       | 20140089 | Fresh                 | 22.5    | na                  | na      | Scarified              | 27/16 <sup>c</sup> | Prop mix        | 10(1)               | 139(874)             | 80            | nd              |
| <i>Eidothea hardeniana</i>       | 20140089 | Dried (15%)           | nd      | 3m                  | na      | Scarified              | 27/15 <sup>c</sup> | Prop mix        | 10(1)               | 128(782)             | 30            | nd              |
| <i>Helicia ferruginea</i>        | 20150339 | Fresh                 | 63.4    | na                  | na      | None                   | 28/16 <sup>c</sup> | Prop mix        | 50(1)               | 13(60)               | 92 a          | 0               |
| <i>Helicia ferruginea</i>        | 20150339 | Dried (15%)           | 4.9     | 2m                  | na      | None                   | 24/14 <sup>c</sup> | Prop mix        | 47(1)               | na                   | 0 b           | 0               |
| <i>Hicksbeachia pinnatifolia</i> | 20120968 | Fresh                 | 70.2    | na                  | na      | Mesocarp removed       | 25                 | WA              | 8(3)                | 5(58)                | 61 ± 6 a      | 16 ± 10         |
| <i>Hicksbeachia pinnatifolia</i> | 20120968 | Dried (15%)           | nd      | 6m                  | na      | Mesocarp removed       | 25                 | WA              | 6(3)                | na                   | 0 ± 0 b       | 0 ± 0           |
| <i>Lomatia arborescens</i>       | 20130997 | Fresh                 | 6.3     | na                  | na      | None                   | 25                 | GA <sub>3</sub> | 10(5)               | 3(7)                 | 100 ± 0 a     | 0 ± 0           |
| <i>Lomatia arborescens</i>       | 20130997 | Dried (15%)           | 3.2     | 3m                  | na      | None                   | 25                 | WA              | 7(5)                | 6(6)                 | 100 ± 0 a     | 0 ± 0           |
| <i>Lomatia arborescens</i>       | 20130997 | Stored (-18)          | nd      | 1m                  | 18m     | None                   | 25                 | GA <sub>3</sub> | 10(5)               | 6(6)                 | 100 ± 0 a     | 0 ± 0           |
| <i>Orites excelsus</i>           | 20140149 | Dried (15%)           | ≤ 3.0   | 14m                 | na      | None                   | 20                 | WA              | 10(5)               | 14(35)               | 94 ± 6        | 0 ± 0           |
| <i>Orites excelsus</i>           | 20140149 | Stored (-18)          | 3.0     | 3m                  | 25m     | None                   | 20                 | Prop mix        | 50(1)               | 22(70)               | 96            | 2               |
| <b>Putranjivaceae</b>            |          |                       |         |                     |         |                        |                    |                 |                     |                      |               |                 |
| <i>Drypetes deplanchei</i>       | 20150516 | Fresh                 | 35.1    | na                  | na      | None                   | 25/10              | Prop mix        | 50(1)               | 59(95)               | 29            | 0               |
| <i>Drypetes deplanchei</i>       | 20150516 | Dried (15%)           | 4.0     | 5m                  | na      | None                   | 25                 | Prop mix        | 43(1)               | 29(104)              | 65 a          | 0               |
| <i>Drypetes deplanchei</i>       | 20150516 | Stored (-18)          | ≤ 4.0   | 10m                 | 1m      | None                   | 25                 | Prop mix        | 50(1)               | 22(134)              | 58 a          | 0               |
| <b>Rhamnaceae</b>                |          |                       |         |                     |         |                        |                    |                 |                     |                      |               |                 |
| <i>Alphitonia excelsa</i>        | 20180101 | Fresh                 | 9.3     | na                  | na      | Scarified              | 20                 | WA              | 10(3)               | 11(11)               | 70 ± 6 a      | 3 ± 3           |
| <i>Alphitonia excelsa</i>        | 20180101 | Dried (15%)           | 3.3     | 1m                  | na      | Scarified              | 20                 | WA              | 10(3)               | 8(15)                | 78 ± 12 a     | 0 ± 0           |
| <i>Alphitonia excelsa</i>        | 20180101 | Stored (-18)          | 3.3     | 1m                  | 1m      | Scarified              | 20                 | WA              | 10(3)               | 6(20)                | 80 ± 0 a      | 0 ± 0           |

| Species                            | Acc No.  | Storage treatments    |         |                   |     | Germination conditions |           |                 | Germination results |                      |               |                 |
|------------------------------------|----------|-----------------------|---------|-------------------|-----|------------------------|-----------|-----------------|---------------------|----------------------|---------------|-----------------|
|                                    |          | Treatment (%RH or °C) | SMC (%) | Duration (months) |     | Pre-treatment          | Temp (°C) | Media           | No. seeds (reps)    | Days to first (last) | Germ (% ± se) | Viable (% ± se) |
| <i>Alphitonia oblata</i>           | 20120963 | Fresh                 | 7.2     | na                | na  | Scarified              | 25        | WA              | 10(5)               | 7(7)                 | 96 ± 2 a      | 0 ± 0           |
| <i>Alphitonia oblata</i>           | 20120963 | Dried (15%)           | 4.2     | 6m                | na  | Scarified              | 25        | GA <sub>3</sub> | 9(5)                | 10(21)               | 81 ± 4 b      | 8 ± 5           |
| <i>Alphitonia oblata</i>           | 20120963 | Stored (-18)          | ≤ 4.2   | 19m               | 6m  | Scarified              | 25        | GA <sub>3</sub> | 10(5)               | 11(16)               | 64 ± 4 c      | 2 ± 2           |
| <i>Emmenosperma alphitonioides</i> | 20140860 | Fresh                 | 8.9     | na                | na  | Scarified distal end   | 20        | GA <sub>3</sub> | 9(4)                | 12(19)               | 83 ± 7 a      | 3 ± 3           |
| <i>Emmenosperma alphitonioides</i> | 20140860 | Dried (15%)           | 6.2     | 3m                | na  | Scarified distal end   | 20        | GA <sub>3</sub> | 10(5)               | 17(65)               | 60 ± 4 b      | 0 ± 0           |
| <i>Emmenosperma alphitonioides</i> | 20140860 | Dried (15%)           | ≤ 6.2   | 9m                | na  | Scarified distal end   | 20        | WA              | 10(5)               | 14(28)               | 74 ± 11 ab    | 0 ± 0           |
| <i>Emmenosperma alphitonioides</i> | 20140860 | Stored (-18)          | ≤ 6.2   | 13m               | 6m  | Scarified distal end   | 20        | GA <sub>3</sub> | 8(5)                | 6(27)                | 46 ± 7 b      | 15 ± 2          |
| <i>Emmenosperma alphitonioides</i> | 20180102 | Fresh                 | 9.7     | na                | na  | Scarified              | 20        | WA              | 10(5)               | 18(39)               | 86 ± 4 a      | 2 ± 2           |
| <i>Emmenosperma alphitonioides</i> | 20180102 | Dried (15%)           | 5.4     | 1m                | na  | Scarified              | 20        | WA              | 10(5)               | 15(33)               | 46 ± 7 b      | 6 ± 2           |
| <i>Emmenosperma alphitonioides</i> | 20180102 | Stored (-18)          | 5.4     | 1m                | 1m  | Scarified              | 20        | WA              | 10(5)               | 15(35)               | 28 ± 7 b      | 12 ± 6          |
| <b>Rousseaceae</b>                 |          |                       |         |                   |     |                        |           |                 |                     |                      |               |                 |
| <i>Abrophyllum ornans</i>          | 20131012 | Stored (-18)          | nd      | 4m                | 8m  | None                   | 20        | WA              | 10(5)               | 25(52)               | 94 ± 2        | 2 ± 2           |
| <i>Cuttsia viburnea</i>            | 20120463 | Stored (-18)          | 2.5     | 5m                | 16m | None                   | 20        | WA              | 20(5)               | 14(61)               | 86 ± 3        | 2 ± 1           |
| <b>Rubiaceae</b>                   |          |                       |         |                   |     |                        |           |                 |                     |                      |               |                 |
| <i>Gynochthodes jasminoides</i>    | 20120175 | Fresh                 | 22.4    | na                | na  | Scarified              | 25        | WA              | 10(5)               | 7(53)                | 100 ± 0 a     | 0 ± 0           |
| <i>Gynochthodes jasminoides</i>    | 20120175 | Dried (15%)           | 8.5     | 1m                | na  | Scarified              | 25        | WA              | 10(5)               | 12(76)               | 89 ± 0 b      | 6 ± 2           |
| <i>Gynochthodes jasminoides</i>    | 20120175 | Stored (-18)          | ≤ 8.5   | 5m                | 14m | Scarified day 11       | 25        | WA              | 10(3)               | 22(22)               | 3 ± 3 c       | 7 ± 7           |
| <i>Psychotria daphnoides</i>       | 20120450 | Fresh                 | 55.9    | na                | na  | None                   | 25        | WA              | 9(5)                | 21(87)               | 67 ± 11 a     | 31 ± 10         |
| <i>Psychotria daphnoides</i>       | 20120450 | Dried (15%)           | 5.1     | 4m                | na  | None                   | 25        | WA              | 10(5)               | 32(74)               | 20 ± 7 b      | 78 ± 6          |
| <i>Psychotria daphnoides</i>       | 20120450 | Stored (-18)          | 5.1     | 4m                | 43m | None                   | 25        | Prop mix        | 50(1)               | 79(338)              | 25            | 69              |
| <i>Psychotria loniceroides</i>     | 20120465 | Fresh                 | 14.9    | na                | na  | None                   | 25        | WA              | 10(5)               | 11(17)               | 98 ± 2 a      | 2 ± 2           |
| <i>Psychotria loniceroides</i>     | 20120465 | Dried (15%)           | 5.4     | 2m                | na  | None                   | 25        | WA              | 10(5)               | 5(58)                | 92 ± 2 a      | 8 ± 2           |
| <i>Psychotria loniceroides</i>     | 20120465 | Stored (-18)          | ≤ 5.4   | 4m                | 28m | None                   | 25        | GA <sub>3</sub> | 10(5)               | 6(27)                | 98 ± 2 a      | 2 ± 2           |
| <i>Psychotria simmondsiana</i>     | 20120460 | Fresh <sup>e</sup>    | 44.2    | na                | na  | None                   | 25        | WA              | 10(5)               | 12(27)               | 94 ± 2 a      | 6 ± 2           |
| <i>Psychotria simmondsiana</i>     | 20120460 | Dried (15%)           | nd      | 4m                | na  | None                   | 25        | WA              | 10(5)               | 18(55)               | 80 ± 8 a      | 10 ± 5          |
| <i>Psychotria simmondsiana</i>     | 20140088 | Stored (-18)          | nd      | 5m                | 28m | None                   | 25        | Prop mix        | 10(5)               | 56(203)              | 8 ± 6         | 14 ± 5          |
| <i>Randia moorei</i>               | 20150531 | Fresh                 | nd      | na                | na  | None                   | 20        | WA              | 10(3)               | 21(128)              | 85 ± 8 a      | 15 ± 8          |
| <i>Randia moorei</i>               | 20150531 | Dried (15%)           | 11.8    | 2m                | na  | None                   | 20        | GA <sub>3</sub> | 10(5)               | 21(78)               | 89 ± 6 a      | 11 ± 6          |
| <i>Randia moorei</i>               | 20150870 | Fresh                 | 44.3    | na                | na  | Not tested             |           |                 |                     |                      |               |                 |
| <i>Randia moorei</i>               | 20150870 | Stored (-18)          | nd      | 3m                | 2m  | None                   | 20        | WA              | 10(4)               | 21(75)               | 95 ± 3 a      | 3 ± 3           |

| Species                           | Acc No.  | Storage treatments    |         |                   |     | Germination conditions |           |                 | Germination results |                      |               |                 |
|-----------------------------------|----------|-----------------------|---------|-------------------|-----|------------------------|-----------|-----------------|---------------------|----------------------|---------------|-----------------|
|                                   |          | Treatment (%RH or °C) | SMC (%) | Duration (months) |     | Pre-treatment          | Temp (°C) | Media           | No. seeds (reps)    | Days to first (last) | Germ (% ± se) | Viable (% ± se) |
| <b>Rutaceae</b>                   |          |                       |         |                   |     |                        |           |                 |                     |                      |               |                 |
| <i>Acradenia euodiiiformis</i>    | 20140061 | Fresh                 | 10.9    | na                | na  | None                   | 20        | GA <sub>3</sub> | 10(5)               | 7(12)                | 76 ± 4 a      | 0 ± 0           |
| <i>Acradenia euodiiiformis</i>    | 20140061 | Dried (15%)           | 6.9     | 1m                | na  | None                   | 20        | GA <sub>3</sub> | 10(5)               | 10(13)               | 58 ± 10 a     | 0 ± 0           |
| <i>Acradenia euodiiiformis</i>    | 20140061 | Stored (-18)          | ≤ 6.9   | 4m                | 22m | None                   | 20        | GA <sub>3</sub> | 10(5)               | 6(21)                | 28 ± 7 b      | 0 ± 0           |
| <i>Acronychia imperforata</i>     | 20180339 | Fresh                 | 13.8    | na                | na  | Precision nicking      | 25/10     | WA              | 15(3)               | 12(91)               | 58 ± 6 a      | 22 ± 10         |
| <i>Acronychia imperforata</i>     | 20180339 | Dried (15%)           | 4.6     | 1m                | na  | Precision nicking      | 25/10     | WA              | 15(2)               | 6(41)                | 40 ± 10 a     | 33 ± 10         |
| <i>Acronychia oblongifolia</i>    | 20180338 | Fresh                 | 20.1    | na                | na  | Scarified              | 25/10     | GA <sub>3</sub> | 20(3)               | 7(35)                | 88 ± 2 a      | 0 ± 0           |
| <i>Acronychia oblongifolia</i>    | 20180338 | Dried (15%)           | 7.8     | 0.5m              | na  | Scarified              | 25/10     | GA <sub>3</sub> | 20(3)               | 6(54)                | 82 ± 9 a      | 0 ± 0           |
| <i>Acronychia oblongifolia</i>    | 20180338 | Stored (-18)          | 7.8     | 0.5m              | 1m  | Scarified              | 25/10     | GA <sub>3</sub> | 20(3)               | 7(41)                | 92 ± 1 a      | 5 ± 3           |
| <i>Clausena smyrelliana</i>       | 20130315 | Fresh                 | nd      | na                | na  | None                   | 25        | GA <sub>3</sub> | 10(5)               | 3(14)                | 58 ± 10 a     | 0 ± 0           |
| <i>Clausena smyrelliana</i>       | 20130315 | Dried (15%)           | 4.7     | 4m                | na  | 0.05% bleach           | 25        | GA <sub>3</sub> | 10(5)               | na                   | 0 ± 0 b       | 0 ± 0           |
| <i>Flindersia pimenteliana</i>    | 20180342 | Fresh                 | 19      | na                | na  | None                   | 25/10     | WA              | 10(3)               | 5(29)                | 90 ± 6 a      | 0 ± 0           |
| <i>Flindersia pimenteliana</i>    | 20180342 | Dried (15%)           | 12.5    | 0.5m              | na  | None                   | 25/10     | WA              | 12(3)               | 8(14)                | 81 ± 3 a      | 0 ± 0           |
| <i>Flindersia pimenteliana</i>    | 20180342 | Stored (-18)          | 12.5    | 0.5m              | 1m  | None                   | 25/10     | WA              | 10(3)               | 6(20)                | 82 ± 9 a      | 0 ± 0           |
| <i>Flindersia schottiana</i>      | 20130083 | Fresh                 | 6.9     | na                | na  | None                   | 25        | WA              | 10(3)               | 3(3)                 | 100 ± 0 a     | 0 ± 0           |
| <i>Flindersia schottiana</i>      | 20130083 | Dried (15%)           | 3.5     | 1m                | na  | None                   | 25        | WA              | 10(3)               | 3(10)                | 100 ± 0 a     | 0 ± 0           |
| <i>Flindersia schottiana</i>      | 20130083 | Stored (-18)          | ≤ 3.5   | 5m                | 18m | None                   | 25        | WA              | 4(5)                | 5(13)                | 67 ± 8 b      | 0 ± 0           |
| <i>Geijera salicifolia</i>        | 20180154 | Fresh                 | 10.5    | na                | na  | Seed coat removed      | 25        | WA              | 10(3)               | 7(14)                | 70 ± 10 a     | 0 ± 0           |
| <i>Geijera salicifolia</i>        | 20180154 | Dried (15%)           | 8.8     | 1m                | na  | Seed coat removed      | 25        | WA              | 10(3)               | 6(10)                | 50 ± 12 a     | 0 ± 0           |
| <i>Geijera salicifolia</i>        | 20180154 | Stored (-18)          | 8.8     | 1m                | 2m  | Seed coat removed      | 25        | WA              | 10(3)               | 6(13)                | 47 ± 9 a      | 0 ± 0           |
| <i>Micromelum minutum</i>         | 20160367 | Fresh                 | 49.8    | na                | na  | None                   | 25        | GA <sub>3</sub> | 10(5)               | 6(20)                | 98 ± 3 a      | 0 ± 0           |
| <i>Micromelum minutum</i>         | 20160367 | Dried (15%)           | 1.2     | 1m                | na  | None                   | 25        | GA <sub>3</sub> | 10(5)               | na                   | 0 ± 0 b       | 0 ± 0           |
| <b>Sapindaceae</b>                |          |                       |         |                   |     |                        |           |                 |                     |                      |               |                 |
| <i>Alectryon subdentatus</i>      | 20130999 | Fresh                 | 39.7    | na                | na  | None                   | 25        | GA <sub>3</sub> | 8(5)                | 9(19)                | 56 ± 8 a      | 9 ± 5           |
| <i>Alectryon subdentatus</i>      | 20130999 | Dried (15%)           | 4.6     | 2m                | na  | None                   | 25        | GA <sub>3</sub> | 9(5)                | 7(17)                | 14 ± 5 b      | 29 ± 9          |
| <i>Castanospora alphanthii</i>    | 20120966 | Fresh                 | 56.2    | na                | na  | None                   | 25        | WA              | 10(5)               | 9(29)                | 100 ± 0 a     | 0 ± 0           |
| <i>Castanospora alphanthii</i>    | 20120966 | Dried (15%)           | 3.8     | 5m                | na  | None                   | 25        | WA              | 10(5)               | na                   | 0 ± 0 b       | 0 ± 0           |
| <i>Cupaniopsis flagelliformis</i> | 20160115 | Fresh                 | 85.6    | na                | na  | None                   | 25        | Prop mix        | 19(1)               | 21(77)               | 100 a         | 0               |
| <i>Cupaniopsis flagelliformis</i> | 20160115 | Dried (47%)           | nd      | 2m                | na  | None                   | 25        | Prop mix        | 16(1)               | 47(47)               | 6 b           | 0               |
| <i>Cupaniopsis flagelliformis</i> | 20160115 | Stored (-18)          | nd      | 4m                | 1m  | None                   | 25        | Prop mix        | 18(1)               | na                   | 0 b           | 0               |

| Species                          | Acc No.  | Storage treatments       |            |                      |     | Germination conditions    |                    |                 | Germination results |                         |                  |                    |
|----------------------------------|----------|--------------------------|------------|----------------------|-----|---------------------------|--------------------|-----------------|---------------------|-------------------------|------------------|--------------------|
|                                  |          | Treatment<br>(%RH or °C) | SMC<br>(%) | Duration<br>(months) |     | Pre-treatment             | Temp<br>(°C)       | Media           | No. seeds<br>(reps) | Days to<br>first (last) | Germ<br>(% ± se) | Viable<br>(% ± se) |
| <i>Diploglottis australis</i>    | 20120962 | Fresh                    | 56.3       | na                   | na  | None                      | 25                 | WA              | 10(5)               | 5(27)                   | 84 ± 8 a         | 0 ± 0              |
| <i>Diploglottis australis</i>    | 20120962 | Dried (15%)              | 4.5        | 2m                   | na  | None                      | 25                 | WA              | 10(5)               | na                      | 0 ± 0 b          | 0 ± 0              |
| <i>Jagera pseudorhus</i>         | 20141388 | Fresh                    | 27.9       | na                   | na  | 1% bleach; aril removed   | 20                 | GA <sub>3</sub> | 10(5)               | 7(31)                   | 94 ± 6 a         | 4 ± 4              |
| <i>Jagera pseudorhus</i>         | 20141388 | Dried (15%)              | 2.7        | 7m                   | na  | 1% bleach; aril removed   | 20                 | GA <sub>3</sub> | 10(5)               | 11(40)                  | 44 ± 7 b         | 36 ± 7             |
| <i>Lepiderema pulchella</i>      | 20141712 | Fresh                    | 41.5       | na                   | na  | None                      | 33/20 <sup>c</sup> | Prop mix        | 50(1)               | 11(20)                  | 88 a             | nd                 |
| <i>Lepiderema pulchella</i>      | 20141712 | Dried (15%)              | 6.7        | 2m                   | na  | None                      | 30/18 <sup>c</sup> | Prop mix        | 50(1)               | na                      | 0 b              | 0                  |
| <i>Mischarytera lautereriana</i> | 20131514 | Fresh                    | 45.9       | na                   | na  | None                      | 25                 | GA <sub>3</sub> | 10(5)               | 6(73)                   | 60 ± 12 a        | 24 ± 8             |
| <i>Mischarytera lautereriana</i> | 20131514 | Dried (15%)              | 3.9        | 4m                   | na  | None                      | 25                 | GA <sub>3</sub> | 10(5)               | na                      | 0 ± 0 b          | 0 ± 0              |
| <i>Mischocarpus australis</i>    | 20120200 | Fresh                    | 52.4       | na                   | na  | None                      | 25                 | WA              | 5(3)                | 12(67)                  | 72 ± 6 a         | 28 ± 6             |
| <i>Mischocarpus australis</i>    | 20120200 | Dried (15%)              | nd         | < 1m                 | na  | None                      | 25                 | WA              | 6(3)                | na                      | 0 ± 0 b          | 43 ± 12            |
| <i>Sarcopteryx stipata</i>       | 20120976 | Fresh                    | 42.1       | na                   | na  | None                      | 25                 | WA              | 10(5)               | 2(5)                    | 96 ± 2 a         | 2 ± 2              |
| <i>Sarcopteryx stipata</i>       | 20120976 | Dried (15%)              | 3.3        | 2m                   | na  | None                      | 25                 | WA              | 10(5)               | na                      | 0 ± 0 b          | 100 ± 0            |
| <b>Sapotaceae</b>                |          |                          |            |                      |     |                           |                    |                 |                     |                         |                  |                    |
| <i>Planchonella australis</i>    | 20160673 | Fresh                    | 33.3       | na                   | na  | Seed coat cracked         | 25                 | Prop mix        | 35(1)               | 10(45)                  | 86 a             | 0                  |
| <i>Planchonella australis</i>    | 20160673 | Dried (63%)              | 11.9       | 1m                   | na  | Seed coat cracked         | 25                 | Prop mix        | 35(1)               | 28(41)                  | 37 b             | 0                  |
| <i>Planchonella australis</i>    | 20160673 | Dried (15%)              | 4.3        | 1m                   | na  | Seed coat cracked         | 25                 | Prop mix        | 35(1)               | 21(40)                  | 0 c              | 0                  |
| <b>Simaroubaceae</b>             |          |                          |            |                      |     |                           |                    |                 |                     |                         |                  |                    |
| <i>Ailanthus triphysa</i>        | 20160124 | Fresh                    | 3.7        | na                   | na  | None                      | 25                 | WA              | 5(2)                | 16(23)                  | 80 ± 20          | 0 ± 0              |
| <i>Ailanthus triphysa</i>        | 20160124 | Dried (15%)              | nd         | 2m                   | na  | None                      | 25                 | WA              | 4(2)                | 5(21)                   | 88 ± 13          | 0 ± 0              |
| <i>Quassia bidwillii</i>         | 20180333 | Fresh                    | 7.9        | na                   | na  | None                      | 20                 | WA              | 10(3)               | 11(25)                  | 67 ± 12 a        | 0 ± 0              |
| <i>Quassia bidwillii</i>         | 20180333 | Dried (15%)              | 2.2        | 0.5m                 | na  | None                      | 20                 | WA              | 13(3)               | 14(28)                  | 57 ± 12 a        | 8 ± 5              |
| <i>Quassia bidwillii</i>         | 20180333 | Stored (-18)             | 2.2        | 0.5m                 | 1m  | None                      | 20                 | WA              | 13(3)               | 13(26)                  | 68 ± 6 a         | 0 ± 0              |
| <i>Quassia sp. Mount Nardi</i>   | 20140188 | Fresh                    | 63.6       | na                   | na  | 2% bleach; e/carp removed | 20                 | GA <sub>3</sub> | 8(5)                | 11(77)                  | 50 ± 13 a        | 0 ± 0              |
| <i>Quassia sp. Mount Nardi</i>   | 20140188 | Dried (15%)              | 3.6        | 3m                   | na  | 2% bleach; e/carp removed | 20                 | GA <sub>3</sub> | 10(5)               | 7(32)                   | 70 ± 8 a         | 0 ± 0              |
| <i>Quassia sp. Mount Nardi</i>   | 20140188 | Stored (-18)             | ≤ 3.6      | 4m                   | 16m | GA soak; e/carp removed   | 20                 | Prop mix        | 10(5)               | na                      | 0 ± 0 b          | 3 ± 3              |
| <b>Solanaceae</b>                |          |                          |            |                      |     |                           |                    |                 |                     |                         |                  |                    |
| <i>Nicotiana forsteri</i>        | 20130069 | Stored (-18)             | 2.5        | 5m                   | 10m | None                      | 20                 | WA              | 10(5)               | 5(38)                   | 94 ± 4           | 0 ± 0              |
| <i>Solanum nemophilum</i>        | 20131004 | Fresh                    | nd         | na                   | na  | None                      | 25                 | GA <sub>3</sub> | 10(5)               | 3(14)                   | 94 ± 2 a         | 2 ± 2              |
| <i>Solanum nemophilum</i>        | 20131004 | Dried (15%)              | 14.0       | 2m                   | na  | None                      | 25                 | GA <sub>3</sub> | 10(5)               | 6(11)                   | 90 ± 3 a         | 0 ± 0              |
| <i>Solanum nemophilum</i>        | 20131004 | Stored (-18)             | ≤ 14.0     | 3m                   | 15m | None                      | 25                 | GA <sub>3</sub> | 10(5)               | 6(14)                   | 78 ± 8 a         | 4 ± 2              |



| Species                      | Acc No.  | Storage treatments    |         |                   |     | Germination conditions |           |                 | Germination results |                      |               |                 |
|------------------------------|----------|-----------------------|---------|-------------------|-----|------------------------|-----------|-----------------|---------------------|----------------------|---------------|-----------------|
|                              |          | Treatment (%RH or °C) | SMC (%) | Duration (months) |     | Pre-treatment          | Temp (°C) | Media           | No. seeds (reps)    | Days to first (last) | Germ (% ± se) | Viable (% ± se) |
| <i>Solanum vicinum</i>       | 20150522 | Stored (-18)          | 3.7     | 3m                | 13m | None                   | 25        | GA <sub>3</sub> | 12(5)               | 33(55)               | 95 ± 5        | 0 ± 0           |
| <b>Thymelaeaceae</b>         |          |                       |         |                   |     |                        |           |                 |                     |                      |               |                 |
| <i>Wikstroemia indica</i>    | 20170118 | Fresh                 | 24.3    | na                | na  | None                   | 25        | GA <sub>3</sub> | 4(5)                | 14(48)               | 55 ± 20 ab    | 0 ± 0           |
| <i>Wikstroemia indica</i>    | 20170118 | Dried (47%)           | nd      | <1m               | na  | None                   | 25        | GA <sub>3</sub> | 4(5)                | 7(26)                | 66 ± 10 a     | 0 ± 0           |
| <i>Wikstroemia indica</i>    | 20170118 | Dried (15%)           | nd      | <1m               | na  | None                   | 25        | GA <sub>3</sub> | 4(5)                | 15(34)               | 3 ± 15 ab     | 0 ± 0           |
| <i>Wikstroemia indica</i>    | 20170118 | Stored (-18)          | nd      | <1m               | 1m  | None                   | 25        | GA <sub>3</sub> | 4(5)                | 7(26)                | 10 ± 10 b     | 0 ± 0           |
| <b>Urticaceae</b>            |          |                       |         |                   |     |                        |           |                 |                     |                      |               |                 |
| <i>Boehmeria macrophylla</i> | 20130251 | Dried (15%)           | nd      | 26m               | na  | None                   | 20        | WA              | 20(5)               | 15(51)               | 91 ± 4 a      | 3 ± 1           |
| <i>Boehmeria macrophylla</i> | 20130251 | Stored (-18)          | nd      | 3m                | 12m | None                   | 20        | WA              | 10(5)               | 12(52)               | 96 ± 2 a      | 2 ± 2           |
| <i>Dendrocnide excelsa</i>   | 20140386 | Fresh                 | nd      | na                | na  | None                   | 20        | GA <sub>3</sub> | 9(5)                | 21(111)              | 78 ± 7 a      | 14 ± 5          |
| <i>Dendrocnide excelsa</i>   | 20140386 | Dried (15%)           | ≤ 3.2   | 3m                | na  | None                   | 20        | GA <sub>3</sub> | 10(5)               | na                   | 0 ± 0 b       | 13 ± 4          |
| <i>Dendrocnide excelsa</i>   | 20140386 | Stored (-18)          | 3.2     | 2m                | 5m  | None                   | 20        | GA <sub>3</sub> | 10(5)               | 7(43)                | 14 ± 5 c      | 2 ± 2           |
| <i>Dendrocnide excelsa</i>   | 20150879 | Dried (15%)           | 4.3     | 2m                | na  | None                   | 25        | WA              | 10(1)               | 7(18)                | 90            | 0               |
| <i>Dendrocnide excelsa</i>   | 20150879 | Stored (-18)          | 4.3     | 2m                | 2m  | None                   | 25        | WA              | 10(1)               | 6(30)                | 80            | 0               |
| <b>Vitaceae</b>              |          |                       |         |                   |     |                        |           |                 |                     |                      |               |                 |
| <i>Cissus antarctica</i>     | 20150336 | Fresh                 | 48.8    | na                | na  | 1% bleach + scarified  | 20        | GA <sub>3</sub> | 7(5)                | 15(92)               | 59 ± 5        | 16 ± 8          |
| <i>Cissus antarctica</i>     | 20150336 | Dried (15%)           | 4.5     | 6m                | na  | 1% bleach              | 20        | GA <sub>3</sub> | 10(4)               | na                   | 0 ± 0         | 100 ± 0         |
| <i>Tetrastigma nitens</i>    | 20150880 | Dried (15%)           | 5.1     | 2m                | na  | None                   | 20        | WA              | 10(3)               | 32(39)               | 97 ± 3 a      | 0 ± 0           |
| <i>Tetrastigma nitens</i>    | 20150880 | Stored (-18)          | 5.1     | 2m                | 3m  | None                   | 20        | WA              | 10(3)               | 23(30)               | 90 ± 6 a      | 0 ± 0           |

<sup>a</sup>Seed held at -18°C for 18 months, followed by 5 months in a drying room at ~15°C and 1 month in cryostorage at -192°C.

<sup>b</sup>Seed held on lab bench for 2 months at ambient relative humidity before sowing.

<sup>c</sup>Experiment conducted in a glasshouse; temperature represents mean maximum & minimum from experiment commencement to emergence of last seedling or for the first 12 months.

<sup>d</sup>Incubator malfunction during the experiment led to temperatures several degrees higher than programmed.

<sup>e</sup>Held hydrated at 15°C for 2 months before processing.
